# Supplementary material for: Clues to unraveling the coral species problem: distinguishing species from geographic variation in Porites across the Pacific with molecular markers and microskeletal traits
Source: PeerJ. 2015 Feb 3;3:e751. doi: 10.7717/peerj.751 (PMC4319317; doi:10.7717/peerj.751)
Supplement: Table S1 [file peerj-03-751-s001.xls]

## Sheet: S1
Specemin	corallite #	NP	triplet	FA	CA	FA/CA	lGPA	ASL	ASW	12,16	LAT	IRR	APD	1,2	3,4	5,6	7,8	9,10	11,12	13,14	14,15	15,16	16,17	17,18	18,19	19,20	21,22	22,23	23,24	25,26	27,28	1,3	3,5	5,7	7,9	9,11	11,13	13,15	15,17	17,19	19,21	21,23	23,1	2,4	4,6	6,8	8,10	10,12	12,14
FJ4	a1	6	fused	0.1835	0.95918	0.191309	0.03549	0.333975	0.10097	0.320112	0.289995	0.164153	0.150074	0.300788	0.298309	0.327306	0.331381	0.263617	0.185773	0.368553	0.461493	0.26939	0.370355	0.32555	0.419902	0.377806	0.339066	0.380387	0.32393	0.0887843	0.113156	0.242463	0.323684	0.341529	0.239023	0.256122	0.285357	0.32851	0.218648	0.262815	0.244327	0.334457	0.280741	0.147813	0.0670868	0.198221	0.0504171	0.200098	0.127861
FJ4	a2	6	free	0.18984	0.97054	0.195602	0.03433	0.323053	0.0857986	0.374722	0.319092	0.148922	0.16625	0.274875	0.315705	0.306213	0.3501	0.358916	0.233095	0.45354	0.427604	0.271965	0.277101	0.355277	0.309663	0.283433	0.328938	0.352253	0.270168	0.105916	0.0656811	0.262941	0.315366	0.28261	0.342996	0.325263	0.243614	0.341462	0.236226	0.311341	0.279461	0.306666	0.208942	0.141366	0.0778603	0.208038	0.05312	0.28589	0.207364
FJ4	a3	5	fused	0.21078	0.96214	0.219074	0.03071	0.308827	0.125801	0.250708	0.300277	0.160424	0.150305	0.236817	0.311459	0.299319	0.236028	0.204651	0.26077	0.356331	0.355154	0.309208	0.358907	0.296503	0.408764	0.355189	0.315656	0.379036	0.257435	0.139291	0.112312	0.25415	0.285932	0.257028	0.191519	0.267874	0.305413	0.310036	0.224011	0.35463	0.207702	0.369027	0.328368	0.215365	0.0398195	0.20488	0.0415353	0.174981	0.202177
FJ4	a4	5	free	0.20052	1.01794	0.196986	0.03024	0.30019	0.0823172	0.454935	0.274968	0.260297	0.175364	0.285895	0.31281	0.326445	0.143578	0.294728	0.191338	0.357641	0.434637	0.200095	0.316808	0.309434	0.395533	0.369312	0.297512	0.305404	0.261878	0.0854305	0.0792039	0.315366	0.271839	0.225473	0.279451	0.275631	0.205332	0.250459	0.318747	0.30407	0.240578	0.244511	0.306675	0.16798	0.0670868	0.219913	0.205443	0.194661	0.198226
FJ4	a5	6	tri	0.21813	0.9801	0.222559	0.03437	0.296359	0.140786	0.33486	0.257122	0.079114	0.152491	0.298144	0.324835	0.317723	0.281577	0.334317	0.276557	0.321844	0.352117	0.188576	0.321043	0.235824	0.324116	0.251527	0.299546	0.318013	0.295988	0.140786	0.140786	0.342996	0.339161	0.188582	0.25351	0.248351	0.29373	0.301302	0.311046	0.204991	0.209039	0.230829	0.303927	0.193279	0.0513295	0.2323	0.0351533	0.172357	0.162905
FJ4	b6	6	free	0.09207	0.92623	0.099403	0.03633	0.27676	0.0899861	0.438293	0.252495	0.207351	0.166999	0.182543	0.258916	0.332385	0.352574	0.305541	0.239914	0.362438	0.383065	0.167376	0.228211	0.286779	0.312725	0.24605	0.276498	0.262768	0.230378	0.0717561	0.108216	0.317179	0.297962	0.302379	0.255826	0.253525	0.273481	0.267234	0.296289	0.24677	0.209429	0.20942	0.273288	0.157109	0.0664794	0.218061	0.0653031	0.194321	0.198368
FJ4	b7	6	free	0.19667	0.88043	0.223379	0.02724	0.300048	0.11933	0.45754	0.293897	0.121823	0.154152	0.282036	0.343109	0.335625	0.336603	0.330256	0.158006	0.356406	0.381793	0.191745	0.269736	0.255739	0.295282	0.288272	0.282814	0.335071	0.358273	0.105628	0.133033	0.31293	0.321571	0.28778	0.288387	0.226124	0.260613	0.286389	0.239914	0.273849	0.204791	0.291781	0.308385	0.16065	0.0536005	0.189077	0.0601972	0.2064	0.253884
FJ4	b8	5	fused	0.1714	0.79691	0.215081	0.02954	0.237319	0.106179	0.308572	0.215737	0.151586	0.141866	0.169481	0.271174	0.204086	0.308456	0.24605	0.134609	0.220986	0.312512	0.207035	0.267971	0.264946	0.272023	0.249307	0.219275	0.223467	0.225729	0.113201	0.0991566	0.26797	0.217763	0.276538	0.315505	0.290106	0.237331	0.241975	0.206508	0.162289	0.213184	0.16739	0.265279	0.172959	0.174944	0.15042	0.0753567	0.200812	0.123382
FJ4	b9	5	tri	0.14988	0.89194	0.168038	0.02826	0.255241	0.107472	0.372142	0.281884	0.0895241	0.168314	0.226023	0.277971	0.255952	0.273809	0.25226	0.186139	0.2775	0.346698	0.212831	0.276503	0.238674	0.26941	0.216679	0.263651	0.270071	0.23969	0.113689	0.101254	0.263282	0.20408	0.24161	0.34785	0.290568	0.251427	0.277489	0.271264	0.270066	0.151079	0.305541	0.305861	0.116091	0.0857867	0.198315	0.07992	0.272021	0.163512
FJ4	b10	5	fused	0.17067	0.86154	0.198099	0.03367	0.27336	0.088564	0.164188	0.263274	0.160377	0.146964	0.171105	0.289648	0.320193	0.331883	0.279873	0.295207	0.274619	0.242663	0.212356	0.312515	0.249796	0.257672	0.21689	0.269743	0.334939	0.314661	0.099604	0.0775241	0.282693	0.283802	0.253527	0.289611	0.280224	0.207522	0.26599	0.235458	0.246636	0.267276	0.233046	0.283018	0.224108	0.0483895	0.184712	0.0811444	0.179913	0.125421
E121	a1	7	free	0.69849	2.676	0.26102	0.03378	0.444972	0.140071	0.450066	0.496895	0.285869	0.261412	0.541443	0.540149	0.417154	0.397218	0.437479	0.335128	0.356411	0.456374	0.434803	0.570404	0.501136	0.452503	0.415656	0.437479	0.425875	0.400345	0.166784	0.113359	0.472341	0.461884	0.367001	0.639943	0.445451	0.323406	0.438334	0.451137	0.442817	0.575222	0.442936	0.396223	0.208036	0.227503	0.296519	0.246791	0.364933	0.234641
E121	a2	8	free	0.5781	2.23841	0.258264	0.03188	0.391839	0.183671	0.471967	0.441156	0.133248	0.260789	0.33312	0.417965	0.4305	0.346533	0.347286	0.356372	0.435445	0.410113	0.358223	0.479016	0.331462	0.335128	0.336024	0.349561	0.537721	0.464959	0.204639	0.162703	0.470803	0.428862	0.390491	0.414268	0.440805	0.599485	0.215424	0.576732	0.418334	0.27847	0.503159	0.442939	0.285339	0.0712798	0.351713	0.262062	0.253541	0.251638
E121	a3	8	free	0.55089	2.41316	0.228286	0.03141	0.465064	0.151342	0.492292	0.458862	0.586985	0.285706	0.404962	0.311298	0.519018	0.304121	0.463539	0.347477	0.456404	0.569907	0.352499	0.562169	0.561873	0.552289	0.384391	0.54861	0.596229	0.506245	0.142361	0.160323	0.520465	0.426527	0.331624	0.403901	0.448578	0.487142	0.407855	0.517802	0.497258	0.316589	0.507761	0.515248	0.26945	0.228776	0.354977	0.205499	0.307437	0.24246
E121	b4	8	free	0.54491	1.64151	0.331957	0.02366	0.359934	0.149687	0.331911	0.385013	0.150383	0.218089	0.398817	0.369157	0.420476	0.28678	0.330427	0.288834	0.311873	0.423072	0.34986	0.424734	0.294932	0.371006	0.337972	0.359565	0.419504	0.371941	0.171124	0.128251	0.394966	0.287121	0.382943	0.448614	0.354108	0.358116	0.28588	0.371723	0.375138	0.402676	0.429179	0.299481	0.214871	0.11607	0.27093	0.22169	0.249577	0.158779
E121	b5	7	free	0.53797	1.49169	0.360645	0.02118	0.3389	0.167303	0.367243	0.373396	0.403352	0.224725	0.326087	0.266482	0.43204	0.454949	0.241846	0.292354	0.276097	0.428224	0.275181	0.411968	0.324834	0.359771	0.312958	0.334279	0.363871	0.321463	0.152681	0.181926	0.323206	0.353183	0.252983	0.373261	0.393916	0.37172	0.296419	0.359636	0.363205	0.356709	0.403937	0.3589	0.241132	0.162139	0.30347	0.175651	0.287817	0.136797
E121	b6	8	free	0.38384	1.58095	0.242791	0.02247	0.341388	0.144133	0.370226	0.36972	0.296354	0.207624	0.346059	0.440768	0.391827	0.290572	0.361658	0.309642	0.252235	0.363001	0.321105	0.499227	0.341511	0.287063	0.259897	0.252659	0.397608	0.34737	0.161733	0.126533	0.458032	0.399944	0.29036	0.382652	0.334523	0.451146	0.277852	0.426663	0.323286	0.229007	0.372997	0.311925	0.246557	0.0487171	0.279686	0.195275	0.198813	0.229684
E121	c7	8	free	0.52608	2.03841	0.258084	0.02006	0.361956	0.182952	0.422249	0.403387	0.247454	0.242133	0.308184	0.307367	0.333912	0.303161	0.360848	0.333676	0.332425	0.438835	0.270402	0.474304	0.452032	0.393155	0.325524	0.344213	0.432329	0.380927	0.181814	0.18409	0.382025	0.356625	0.278834	0.442516	0.354378	0.453356	0.389786	0.38585	0.390886	0.320836	0.423522	0.427161	0.36695	0.0340118	0.265621	0.264877	0.274319	0.207479
E121	c8	7	free	0.35878	1.21138	0.296175	0.01441	0.302667	0.114687	0.389133	0.321717	0.16422	0.212491	0.257796	0.261319	0.236649	0.309946	0.284857	0.301471	0.336703	0.434172	0.239619	0.363149	0.242068	0.310215	0.285761	0.245714	0.416749	0.316483	0.0980953	0.131279	0.34629	0.298818	0.273852	0.325524	0.344212	0.361592	0.399924	0.236843	0.266792	0.321961	0.395735	0.355326	0.255091	0.103262	0.343955	0.02886	0.231311	0.194543
E121	c9	8	free	0.48793	1.70858	0.285576	0.01561	0.355302	0.162133	0.443545	0.373978	0.342825	0.231373	0.302129	0.296672	0.374187	0.402316	0.322808	0.273438	0.343337	0.462526	0.296828	0.409572	0.285671	0.380536	0.34148	0.429354	0.464621	0.29936	0.166057	0.15821	0.38585	0.360168	0.350835	0.386689	0.391243	0.375154	0.394507	0.3338	0.370182	0.373451	0.37887	0.361871	0.229312	0.168268	0.291171	0.0669955	0.289211	0.241248
E121	c10	8	free	0.55314	1.87979	0.294256	0.00863	0.367793	0.18053	0.451584	0.402294	0.311052	0.252267	0.318493	0.30437	0.450874	0.402233	0.431318	0.346832	0.33246	0.411641	0.315088	0.459128	0.3628	0.419131	0.26458	0.296565	0.435363	0.333808	0.162747	0.198312	0.397097	0.443346	0.321529	0.429434	0.448018	0.477585	0.36632	0.378861	0.323216	0.45691	0.413181	0.35556	0.290697	0.164515	0.377886	0.0966699	0.263125	0.23493
E20	a1	9	free	0.27648	1.16502	0.237318	0.0236	0.255594	0.0743201	0.351866	0.295928	0.36302	0.201737	0.325884	0.236664	0.220485	0.326781	0.253138	0.261159	0.198776	0.263514	0.219658	0.308843	0.161943	0.230216	0.341791	0.197244	0.252824	0.290593	0.0910543	0.057586	0.302183	0.307899	0.331569	0.323172	0.293533	0.315831	0.294054	0.293533	0.255412	0.239471	0.297229	0.314128	0.164978	0.208317	0.241661	0.122732	0.255051	0.150763
E20	a2	6	tri	0.26073	1.05829	0.246369	0.01921	0.255069	0.0944737	0.264721	0.277227	0.339397	0.165118	0.241661	0.196679	0.257694	0.233227	0.235381	0.207289	0.205976	0.262702	0.201358	0.312651	0.183053	0.330226	0.285818	0.190889	0.372152	0.364351	0.121497	0.06745	0.329862	0.262209	0.22726	0.255682	0.207046	0.243865	0.242035	0.319786	0.273523	0.230356	0.317492	0.306903	0.204398	0.153486	0.210536	0.0604989	0.170226	0.128775
E20	a3	8	free	0.40319	1.1948	0.337454	0.022	0.290954	0.0759651	0.324826	0.30234	0.108295	0.162382	0.320824	0.261928	0.220763	0.271781	0.276401	0.260975	0.266073	0.354876	0.240727	0.311708	0.299004	0.354226	0.33389	0.303694	0.302328	0.276071	0.06745	0.0844803	0.29426	0.263939	0.263929	0.279888	0.298623	0.287299	0.278118	0.280422	0.373105	0.305251	0.292428	0.269391	0.169989	0.111064	0.21928	0.0469498	0.193099	0.157896
E20	a4	8	free	0.35371	1.32925	0.266097	0.02443	0.321956	0.141825	0.359131	0.334917	0.332823	0.199794	0.238372	0.245477	0.361368	0.34179	0.366343	0.303421	0.33603	0.388554	0.283016	0.414024	0.385	0.376708	0.206357	0.252183	0.38673	0.26592	0.14396	0.13969	0.304519	0.356184	0.34016	0.390008	0.431778	0.310514	0.313164	0.339202	0.296926	0.278152	0.296549	0.235938	0.182106	0.145019	0.2483	0.145018	0.223674	0.195443
E20	a5	8	free	0.27592	1.26782	0.217633	0.01591	0.280409	0.0958981	0.290936	0.309835	0.261152	0.180476	0.318035	0.365597	0.249446	0.448824	0.366009	0.345816	0.225239	0.277528	0.238372	0.332887	0.157319	0.225244	0.217717	0.221073	0.278152	0.219285	0.0892585	0.102538	0.345589	0.336018	0.3618	0.459832	0.231138	0.28161	0.278945	0.258246	0.188275	0.277635	0.255215	0.319362	0.114639	0.167107	0.275882	0.131102	0.210772	0.113503
E20	b6	8	free	0.20046	0.82437	0.243168	0.02099	0.242412	0.0834299	0.311171	0.262325	0.262637	0.15183	0.191006	0.131182	0.306029	0.32277	0.299148	0.214402	0.23741	0.309173	0.229647	0.299369	0.242139	0.233596	0.184435	0.218557	0.234707	0.22502	0.0861438	0.080716	0.229354	0.193109	0.227259	0.393564	0.243962	0.345489	0.264281	0.208652	0.262815	0.14342	0.199812	0.241334	0.214836	0.0916296	0.189062	0.109341	0.168601	0.19184
E20	b7	8	free	0.15297	0.67563	0.226411	0.01023	0.199238	0.110768	0.38624	0.225418	0.437562	0.186359	0.15657	0.0667118	0.287795	0.197369	0.191012	0.17638	0.30457	0.342547	0.144106	0.192624	0.22608	0.227592	0.131695	0.206713	0.245064	0.0909767	0.131386	0.09015	0.221003	0.219363	0.189207	0.24175	0.357335	0.211692	0.149546	0.206222	0.22686	0.227178	0.213699	0.208938	0.22961	0.197018	0.240644	0.0467191	0.175048	0.170582
E20	b8	8	free	0.18338	0.63181	0.290245	0.00962	0.212218	0.0805069	0.315419	0.220948	0.0719269	0.139833	0.211692	0.21732	0.19536	0.205044	0.191318	0.161423	0.175995	0.275299	0.198387	0.276365	0.213109	0.258174	0.239802	0.180716	0.224322	0.171168	0.0844703	0.0765435	0.242446	0.194273	0.20898	0.242732	0.21448	0.283677	0.251293	0.225668	0.221757	0.183484	0.225028	0.220279	0.132959	0.0695369	0.184799	0.0795664	0.168745	0.192632
E20	b9	8	free	0.18301	0.92681	0.197462	0.0071	0.242806	0.0880618	0.334664	0.269285	0.0953595	0.155242	0.233304	0.247662	0.220668	0.296865	0.270126	0.155499	0.323948	0.340717	0.240118	0.247105	0.23765	0.24653	0.21452	0.208975	0.210727	0.190478	0.0753352	0.100789	0.223118	0.285367	0.239385	0.326365	0.284182	0.222667	0.29102	0.263805	0.272784	0.211537	0.192623	0.232118	0.192623	0.0320003	0.214411	0.0538974	0.239348	0.186922
E20	b10	8	free	0.14797	0.85308	0.173454	0.00557	0.234706	0.0974233	0.269637	0.256536	0.144965	0.142819	0.250354	0.239802	0.178977	0.166848	0.222217	0.163951	0.237685	0.25404	0.19608	0.336319	0.221799	0.293775	0.231105	0.257335	0.267129	0.237871	0.0920822	0.102764	0.267571	0.249983	0.229351	0.215037	0.208652	0.257884	0.224165	0.252355	0.307132	0.200445	0.253991	0.207319	0.117199	0.0769873	0.203766	0.0667075	0.15359	0.153597
E47	a1	8	free	0.49973	1.53572	0.325404	0.02529	0.32355	0.105114	0.337562	0.349567	0.177363	0.202752	0.351351	0.315417	0.359301	0.314111	0.366475	0.252986	0.2877	0.399736	0.278811	0.373926	0.256797	0.341516	0.274632	0.351202	0.364912	0.287923	0.101378	0.10885	0.30975	0.361657	0.3214	0.389407	0.336131	0.344896	0.338224	0.355831	0.321814	0.332668	0.325388	0.330387	0.233956	0.0991141	0.250499	0.147841	0.258453	0.146024
E47	a2	8	free	0.45533	1.43991	0.316221	0.02849	0.31427	0.119254	0.497581	0.339393	0.163971	0.214105	0.263191	0.303511	0.335378	0.32913	0.410256	0.247074	0.345854	0.412165	0.188944	0.350329	0.26269	0.297741	0.31168	0.300864	0.366667	0.302852	0.123937	0.114571	0.320781	0.331265	0.339481	0.383524	0.331272	0.383522	0.368765	0.317944	0.334146	0.319107	0.308639	0.350403	0.233791	0.062128	0.263146	0.0718705	0.256581	0.25283
E47	a3	8	free	0.45538	1.29484	0.351688	0.03919	0.288053	0.0858853	0.399529	0.315027	0.204146	0.193555	0.195051	0.287185	0.270776	0.271561	0.337911	0.245285	0.310651	0.292831	0.158277	0.328318	0.307856	0.368765	0.34163	0.335391	0.309586	0.247779	0.115957	0.0558139	0.302364	0.275206	0.296091	0.329257	0.330583	0.368506	0.238246	0.335737	0.334861	0.269984	0.320783	0.341664	0.220426	0.0475631	0.259273	0.0277875	0.293693	0.216957
E47	b4	8	free	0.72609	2.04384	0.355258	0.03395	0.376285	0.127628	0.443993	0.415444	0.116749	0.261166	0.230126	0.317972	0.320527	0.36467	0.355928	0.285607	0.406521	0.473515	0.345555	0.460533	0.359562	0.420652	0.451542	0.399527	0.442268	0.386056	0.132806	0.12245	0.403368	0.378558	0.352435	0.371498	0.412182	0.460534	0.447865	0.327059	0.471655	0.413297	0.440067	0.385141	0.372807	0.0332	0.402433	0.0777286	0.2899	0.253728
E47	b5	8	free	0.66696	2.09194	0.318824	0.0332	0.368847	0.136565	0.50809	0.418105	0.234863	0.253133	0.373339	0.318258	0.300281	0.307037	0.423735	0.294878	0.292472	0.416017	0.365283	0.504355	0.288294	0.419386	0.350423	0.388218	0.433304	0.426277	0.120256	0.152874	0.401177	0.371209	0.359372	0.433455	0.397203	0.414102	0.409605	0.413031	0.442567	0.3962	0.425189	0.370077	0.232505	0.11823	0.37716	0.0987141	0.304737	0.246406
E47	b6	7	free	0.59509	1.94092	0.306602	0.0433	0.337642	0.127634	0.533608	0.387781	0.428501	0.277322	0.359135	0.329688	0.27707	0.216183	0.375635	0.308113	0.256235	0.481823	0.282737	0.428392	0.239422	0.338654	0.342791	0.414155	0.451151	0.301093	0.142576	0.112692	0.436902	0.329757	0.351999	0.396193	0.403262	0.402433	0.421858	0.384738	0.39514	0.338141	0.430035	0.418123	0.294952	0.0547645	0.352185	0.217822	0.252417	0.295848
E47	b7	6	tri	0.64924	1.91751	0.338585	0.0403	0.359773	0.14339	0.362637	0.412304	0.328321	0.266799	0.40555	0.3479	0.29406	0.286224	0.363034	0.244883	0.325573	0.46387	0.374751	0.561729	0.224692	0.438469	0.295855	0.418761	0.418761	0.292254	0.12617	0.16061	0.409608	0.405544	0.420494	0.40506	0.370964	0.337355	0.439869	0.343052	0.416017	0.372087	0.422595	0.390822	0.294724	0.0469519	0.409608	0.101582	0.315674	0.213422
E47	c8	7	free	0.33223	1.01788	0.326394	0.02047	0.240419	0.0747845	0.395008	0.26971	0.182486	0.184222	0.27391	0.256266	0.230433	0.212022	0.190608	0.149608	0.30744	0.339074	0.160923	0.300284	0.141948	0.236745	0.260179	0.268202	0.267868	0.251193	0.052351	0.097218	0.253999	0.267912	0.269714	0.258429	0.244449	0.292302	0.311166	0.243633	0.284871	0.287782	0.26763	0.287383	0.187011	0.08695	0.206194	0.0622511	0.229451	0.21157
E47	c9	8	free	0.28302	0.73346	0.38587	0.01414	0.195716	0.0917183	0.309147	0.228965	0.164165	0.159434	0.14242	0.188968	0.222891	0.171115	0.220407	0.143546	0.126383	0.272115	0.152674	0.256669	0.188219	0.233334	0.233973	0.213928	0.186088	0.178732	0.0760579	0.107379	0.255629	0.219521	0.229442	0.207102	0.283445	0.210721	0.271662	0.252779	0.244791	0.219335	0.244449	0.235145	0.152172	0.0653649	0.209861	0.0701106	0.220413	0.143012
E47	c10	8	free	0.30051	0.75112	0.400083	0.01718	0.204821	0.100748	0.385748	0.255367	0.185895	0.173563	0.161337	0.196424	0.174026	0.187414	0.207428	0.159451	0.208881	0.297506	0.153729	0.242003	0.19686	0.312348	0.174017	0.129051	0.226963	0.249692	0.117076	0.0844205	0.218087	0.220023	0.253526	0.228251	0.24706	0.231085	0.266965	0.260872	0.304748	0.262886	0.268445	0.255901	0.180941	0.0687435	0.226257	0.0307393	0.190615	0.194448
E48	a1	7	free	0.3835	1.50273	0.255202	0.00783	0.338749	0.116771	0.384032	0.316901	0.529024	0.204134	0.299244	0.228039	0.444669	0.312155	0.474542	0.342818	0.382836	0.4489	0.32482	0.343387	0.239878	0.323713	0.345748	0.256377	0.352342	0.300514	0.112622	0.12092	0.326518	0.308818	0.358694	0.28231	0.322297	0.372036	0.349635	0.337995	0.324025	0.341864	0.35245	0.337855	0.189879	0.183333	0.243586	0.194771	0.161887	0.181596
E48	a2	8	free	0.41371	1.29227	0.320142	0.01289	0.286712	0.123392	0.423983	0.293881	0.0848878	0.197116	0.268629	0.305439	0.30739	0.319619	0.265177	0.232167	0.215983	0.341506	0.240998	0.368343	0.255544	0.334132	0.276195	0.257137	0.349847	0.249293	0.138469	0.108315	0.412883	0.316805	0.301851	0.246775	0.272116	0.347283	0.376749	0.317597	0.291283	0.285995	0.320659	0.262705	0.165308	0.212668	0.174902	0.130568	0.196294	0.185514
E48	a3	6	free	0.42466	1.41044	0.301083	0.02553	0.318312	0.113659	0.365176	0.328615	0.2727	0.210557	0.230034	0.310389	0.235765	0.28987	0.345182	0.403133	0.22991	0.371445	0.295737	0.477196	0.389289	0.366516	0.280059	0.29323	0.315537	0.259696	0.127606	0.0997129	0.322407	0.282414	0.314122	0.360814	0.35374	0.348195	0.329957	0.365896	0.30345	0.333302	0.367784	0.340822	0.232455	0.192608	0.192608	0.198149	0.19002	0.187107
E48	a4	9	free	0.33096	1.36225	0.242951	0.02044	0.329751	0.102752	0.338358	0.344534	0.150368	0.194741	0.286763	0.282937	0.298998	0.324485	0.323675	0.272217	0.310984	0.483777	0.32777	0.378582	0.289489	0.408091	0.312984	0.364959	0.355351	0.254956	0.0985747	0.10693	0.323908	0.287124	0.247345	0.364959	0.378127	0.33833	0.377713	0.277613	0.308118	0.280287	0.417935	0.357207	0.220727	0.0778577	0.259263	0.101934	0.228036	0.1412
E48	b5	6	free	0.7071	1.91432	0.369374	0.04168	0.31909	0.176439	0.467976	0.394962	0.135499	0.265298	0.250597	0.301977	0.294755	0.272151	0.26221	0.260521	0.261377	0.365405	0.303148	0.477241	0.311023	0.328225	0.2616	0.291153	0.503997	0.360066	0.19498	0.157898	0.453162	0.387565	0.41249	0.399463	0.3553	0.369711	0.378222	0.406586	0.379149	0.351203	0.413672	0.310165	0.338091	0.198848	0.337348	0.158548	0.276692	0.249659
E48	b6	7	free	0.92969	2.31279	0.401978	0.01719	0.397593	0.149039	0.475238	0.416918	0.251836	0.262264	0.3412	0.380269	0.318843	0.348174	0.442116	0.339176	0.38223	0.528013	0.368921	0.536197	0.380078	0.470776	0.308747	0.377168	0.48755	0.352031	0.113859	0.18422	0.413342	0.422372	0.393912	0.417582	0.419299	0.522006	0.44529	0.413672	0.406187	0.435498	0.42153	0.359455	0.246641	0.195726	0.362547	0.117158	0.269054	0.238361
E48	b7	8	free	0.87825	2.20201	0.39884	0.01481	0.369274	0.153294	0.463976	0.425078	0.129564	0.267215	0.368163	0.35003	0.347715	0.316353	0.32513	0.352031	0.360916	0.487128	0.348677	0.428153	0.318572	0.448761	0.301445	0.291149	0.471674	0.392493	0.14583	0.160758	0.487125	0.386204	0.407738	0.41218	0.433296	0.459549	0.403298	0.424538	0.464445	0.379614	0.437482	0.375375	0.276153	0.209194	0.321775	0.233829	0.249481	0.252748
E48	c8	7	free	0.27552	1.41256	0.19505	0.01449	0.338237	0.146943	0.345202	0.334556	0.155748	0.199298	0.351732	0.310785	0.272015	0.337501	0.371351	0.308793	0.331216	0.41329	0.35896	0.454897	0.304355	0.339596	0.28576	0.356396	0.323275	0.291864	0.14024	0.153646	0.321319	0.32136	0.274279	0.36293	0.352567	0.365983	0.393016	0.328588	0.333316	0.320066	0.320618	0.339596	0.193173	0.173792	0.258178	0.0227	0.294442	0.202701
E48	c9	9	free	0.27492	1.09649	0.250727	0.00717	0.27905	0.12875	0.286215	0.303972	0.28447	0.202691	0.251827	0.21628	0.339328	0.267081	0.258851	0.215755	0.326325	0.411165	0.331091	0.396671	0.268664	0.20407	0.288924	0.267087	0.287525	0.134155	0.13659	0.120909	0.27292	0.325534	0.32441	0.319169	0.276636	0.310391	0.330715	0.262764	0.33221	0.29878	0.238973	0.277119	0.212773	0.051778	0.252727	0.144797	0.261943	0.141418
E48	c10	8	fused	0.382	1.50426	0.253945	0.0108	0.323942	0.130848	0.442999	0.312479	0.124303	0.206049	0.292328	0.253823	0.254676	0.246908	0.317993	0.325561	0.308495	0.434093	0.359046	0.4677	0.361535	0.368481	0.363951	0.225793	0.326947	0.275741	0.10639	0.155306	0.345114	0.267928	0.31588	0.321127	0.355207	0.420341	0.403373	0.359734	0.342504	0.35244	0.318358	0.327829	0.202504	0.1726	0.225802	0.113601	0.254918	0.231918
fJ6	a1	6	fused	0.19071	1.22181	0.156088	0.04382	0.303958	0.0905353	0.232238	0.295404	0.131025	0.159914	0.275894	0.22008	0.286385	0.288584	0.28812	0.329036	0.332381	0.398969	0.403296	0.350404	0.283012	0.313565	0.291582	0.278415	0.300881	0.222728	0.0898033	0.0912673	0.288928	0.262092	0.302044	0.353051	0.270071	0.302776	0.27264	0.390173	0.323806	0.254916	0.242667	0.280539	0.156257	0.0573708	0.247039	0.145115	0.160787	0.139526
fJ6	a2	7	free	0.17522	1.09087	0.160624	0.03955	0.334722	0.111624	0.341745	0.326907	0.354299	0.208556	0.340436	0.373219	0.174933	0.394962	0.425656	0.328162	0.324656	0.364868	0.220277	0.343269	0.340332	0.409392	0.260073	0.3668	0.366771	0.32174	0.110037	0.113212	0.384712	0.359523	0.170261	0.266986	0.330284	0.401316	0.289962	0.257672	0.31084	0.299114	0.370281	0.363889	0.189485	0.347882	0.298957	0.09519	0.165585	0.185488
fJ6	a3	8	free	0.13543	1.23058	0.110054	0.04443	0.356803	0.0835026	0.326685	0.339384	0.251388	0.169273	0.300988	0.31124	0.325704	0.351289	0.25401	0.299105	0.347977	0.479786	0.348986	0.456355	0.425504	0.446064	0.338614	0.362072	0.351832	0.309317	0.0711338	0.0958714	0.358022	0.317773	0.206029	0.352322	0.340657	0.306083	0.324646	0.27972	0.284579	0.289835	0.402862	0.283944	0.151079	0.104377	0.230523	0.0565955	0.231479	0.163173
fJ6	a4	7	?	0.22003	1.24139	0.177245	0.03694	0.362644	0.0951531	0.2675	0.372211	0.206541	0.164494	0.377926	0.328902	0.36498	0.343954	0.380721	0.202514	0.313287	0.402855	0.313574	0.41814	0.374278	0.41006	0.32584	0.448508	0.433522	0.363251	0.108212	0.082094	0.308993	0.407109	0.255953	0.372097	0.230523	0.324884	0.317883	0.226851	0.353323	0.297072	0.356316	0.31815	0.14753	0.105118	0.183862	0.047008	0.227815	0.149611
fJ6	b5	6	free	0.19852	1.16124	0.170955	0.03283	0.328224	0.0877523	0.347328	0.279594	0.274858	0.167514	0.287976	0.280779	0.294659	0.228271	0.416625	0.260345	0.369226	0.451818	0.286341	0.345236	0.298869	0.382355	0.359224	0.31413	0.349324	0.326399	0.103648	0.071857	0.302763	0.246705	0.304632	0.235295	0.375091	0.312892	0.3264	0.245582	0.328677	0.302831	0.307701	0.215612	0.144943	0.0521585	0.197337	0.188481	0.248943	0.177461
fJ6	b6	7	tri	0.19636	0.84099	0.233487	0.0367	0.286803	0.110287	0.228482	0.264201	0.112309	0.137044	0.235167	0.274591	0.264873	0.295889	0.283244	0.276714	0.283033	0.286069	0.224811	0.352161	0.255414	0.321748	0.313969	0.309287	0.333977	0.277896	0.098942	0.121631	0.211332	0.32392	0.31777	0.170624	0.233475	0.33121	0.288967	0.277934	0.264989	0.192438	0.297272	0.233648	0.129535	0.0807034	0.19593	0.0324404	0.189319	0.127459
fJ6	c7	8	free	0.16624	1.11593	0.14897	0.04851	0.329932	0.113611	0.372533	0.304677	0.139346	0.149633	0.281218	0.296267	0.323939	0.349847	0.360225	0.199693	0.263592	0.397707	0.277278	0.388786	0.389291	0.310384	0.30496	0.385704	0.381273	0.368741	0.135611	0.0916099	0.247223	0.307848	0.222071	0.280049	0.295615	0.290925	0.321945	0.305446	0.330043	0.341431	0.300767	0.33523	0.116284	0.0337326	0.208913	0.054622	0.169375	0.212675
fJ6	b8	8	free	0.21905	1.06022	0.206608	0.03845	0.312618	0.0741847	0.309695	0.363986	0.117474	0.164821	0.311972	0.355183	0.323929	0.298703	0.24895	0.237688	0.301877	0.315097	0.236222	0.283589	0.263824	0.337177	0.283004	0.384198	0.418985	0.401486	0.0714387	0.0769307	0.260794	0.41077	0.250185	0.296963	0.314632	0.240349	0.274446	0.272083	0.40196	0.361939	0.346251	0.239972	0.14813	0.0821678	0.200138	0.102877	0.191408	0.16585
fJ6	c9	6	free	0.20125	1.04849	0.191943	0.03014	0.290947	0.0757053	0.338282	0.281731	0.253021	0.146035	0.270699	0.251603	0.354798	0.383698	0.400337	0.227909	0.303235	0.414171	0.274269	0.343874	0.34008	0.278051	0.215942	0.191294	0.204852	0.200343	0.0735529	0.0778577	0.220425	0.291418	0.2764	0.262699	0.31821	0.329619	0.331866	0.210561	0.3176	0.196964	0.255206	0.272114	0.15085	0.0503571	0.221317	0.0549634	0.154335	0.173832
fJ6	c10	6	fused	0.1569	0.92634	0.169376	0.03934	0.259111	0.0994681	0.325009	0.307228	0.0502276	0.158373	0.258731	0.268736	0.299124	0.24922	0.251077	0.162564	0.234961	0.295507	0.173719	0.252749	0.272392	0.275455	0.273149	0.268632	0.323908	0.285857	0.0984822	0.100454	0.262735	0.297843	0.244305	0.258872	0.32643	0.24753	0.214459	0.258732	0.330324	0.224116	0.341873	0.210335	0.123675	0.10265	0.177911	0.086916	0.235991	0.160671
G3	a1		free	0.36864	1.17343	0.314156	0.04851	0.245615	0.127499	0.322612	0.292347	0.291135	0.20646	0.207805	0.176822	0.28	0.33059	0.21609	0.222102	0.224629	0.292329	0.210503	0.319642	0.238773	0.2576	0.233863	0.177088	0.296377	0.245635	0.164701	0.0902973	0.33642	0.352444	0.423384	0.378238	0.33267	0.301049	0.256991	0.27554	0.213242	0.325571	0.225465	0.337722	0.252249	0.177088	0.278033	0.169487	0.237654	0.187746
G3	a2		free	0.35333	1.15239	0.306606	0.04851	0.246334	0.115348	0.421016	0.298857	0.0776877	0.196337	0.214634	0.253241	0.303073	0.241775	0.235267	0.24397	0.168373	0.278484	0.192692	0.333423	0.24158	0.298065	0.255031	0.206518	0.260806	0.214415	0.123708	0.106988	0.278033	0.322717	0.288278	0.30698	0.273255	0.348867	0.274628	0.297222	0.318758	0.226921	0.246972	0.351776	0.235533	0.0595288	0.292329	0.0992323	0.190235	0.243133
G3	a3		fused	0.31454	1.09559	0.287096	0.0176	0.254037	0.11105	0.2773	0.316976	0.182004	0.189606	0.212505	0.257661	0.305547	0.321939	0.2688	0.172876	0.211321	0.303694	0.168373	0.309777	0.2296	0.246972	0.211321	0.213976	0.353555	0.276676	0.130253	0.0918468	0.265572	0.296165	0.293453	0.31345	0.308458	0.233057	0.250752	0.226506	0.325571	0.325812	0.332717	0.324848	0.177088	0.102802	0.302607	0.0638498	0.225743	0.122818
G3	a4	4	fused	0.2374	0.96862	0.245091	0.00401	0.250949	0.189879	0.409735	0.292827	0.191184	0.190799	0.217897	0.306162	0.243133	0.17369	0.270312	0.239429	0.194796	0.341646	0.200743	0.306162	0.185562	0.262185	0.209907	0.265336	0.340082	0.258147	0.183437	0.19632	0.290553	0.274914	0.24106	0.293399	0.306367	0.3138	0.338603	0.303125	0.279888	0.216163	0.323106	0.270312	0.23393	0.077999	0.226783	0.130253	0.175754	0.210876
G3	a5	7	free	0.36848	1.08719	0.338929	0.01182	0.256939	0.106497	0.379679	0.304825	0.144051	0.186975	0.209907	0.297591	0.345616	0.229805	0.275768	0.216163	0.186405	0.285215	0.179287	0.316041	0.274571	0.266986	0.2296	0.258147	0.28686	0.253056	0.0918468	0.121147	0.301361	0.342334	0.277299	0.334972	0.330447	0.306162	0.310485	0.280895	0.305136	0.257417	0.236861	0.27554	0.193423	0.09796	0.207805	0.183437	0.217825	0.166217
G3	b6	5	fused	0.32568	1.01128	0.322047	0.00857	0.234531	0.110325	0.258097	0.306587	0.189245	0.184377	0.198727	0.266105	0.20883	0.255989	0.295452	0.227048	0.166244	0.224465	0.198057	0.342803	0.185594	0.321196	0.251746	0.173374	0.237136	0.199728	0.111298	0.109352	0.246411	0.278189	0.328155	0.358989	0.265171	0.222469	0.243768	0.279566	0.322185	0.271115	0.266984	0.241307	0.227414	0.0644435	0.239852	0.123207	0.234602	0.133683
G3	b7	2	fused	0.21474	1.08452	0.198005	0.01053	0.260251	0.117252	0.190564	0.285615	0.157289	0.173352	0.224766	0.208758	0.274947	0.258069	0.253842	0.294542	0.308913	0.321357	0.228002	0.30502	0.180415	0.285268	0.235169	0.225434	0.301957	0.257551	0.136013	0.0984901	0.304146	0.251608	0.303708	0.293876	0.349473	0.28666	0.249489	0.242328	0.285275	0.28822	0.3117	0.242124	0.197136	0.154863	0.175948	0.152586	0.21726	0.0694003
G3	b8	6	fused	0.42526	1.0615	0.400622	0.01402	0.252925	0.149174	0.242274	0.300421	0.116	0.187283	0.216031	0.172892	0.224472	0.22239	0.248088	0.277115	0.304315	0.350857	0.2884	0.331336	0.2489	0.271851	0.219078	0.200479	0.279026	0.191579	0.171944	0.126405	0.288847	0.340479	0.253055	0.303324	0.351985	0.304309	0.288056	0.275493	0.274953	0.297522	0.282929	0.245202	0.251281	0.0979782	0.294555	0.0815011	0.25935	0.13142
G3	b9	7	tri	0.44738	1.33928	0.334045	0.0176	0.292004	0.165861	0.2862	0.331085	0.187379	0.204793	0.195952	0.196709	0.202699	0.285267	0.371044	0.339059	0.346232	0.355832	0.198311	0.398713	0.235243	0.364728	0.276212	0.252599	0.346222	0.307243	0.163008	0.168713	0.30069	0.356435	0.28105	0.327845	0.308542	0.287124	0.39245	0.276766	0.329912	0.303328	0.310148	0.409839	0.28822	0.208836	0.259606	0.0543673	0.21332	0.121167
G3	b10	7	free	0.31777	1.14657	0.277148	0.01226	0.257591	0.135404	0.387304	0.311779	0.0964387	0.203656	0.258829	0.226018	0.306807	0.241916	0.242402	0.188781	0.321196	0.320467	0.185589	0.329771	0.232323	0.277237	0.223809	0.240681	0.291594	0.234029	0.139387	0.131421	0.301947	0.367812	0.245197	0.2767	0.314453	0.298914	0.255801	0.283808	0.353253	0.317199	0.249352	0.338275	0.169607	0.0749246	0.298916	0.150282	0.167535	0.243226
G66	a1	8	free	0.20105	0.96916	0.207448	0.01423	0.265919	0.111316	0.265666	0.252066	0.339677	0.157481	0.242643	0.240489	0.234289	0.270591	0.321374	0.290601	0.275534	0.275418	0.231678	0.276944	0.294834	0.337524	0.203414	0.338804	0.273033	0.14753	0.12691	0.0957215	0.332064	0.252319	0.243317	0.221204	0.193317	0.303245	0.290494	0.248367	0.245454	0.227642	0.289288	0.262678	0.194835	0.0480359	0.192698	0.0584615	0.177037	0.140039
G66	a2	7	free	0.11024	0.71542	0.154091	0.00971	0.233288	0.0899862	0.211301	0.270644	0.201498	0.137005	0.153456	0.191791	0.237986	0.295719	0.304149	0.232049	0.276247	0.289854	0.217275	0.2508	0.237891	0.31728	0.153894	0.131953	0.247432	0.194829	0.0772261	0.102746	0.221204	0.182899	0.234014	0.240844	0.228796	0.205112	0.184858	0.223987	0.37686	0.26101	0.281973	0.202553	0.132618	0.023328	0.190307	0.0339665	0.169055	0.10359
G66	a3	6	free	0.18503	0.78217	0.23656	0.01136	0.214028	0.148989	0.285677	0.252821	0.134391	0.15794	0.198653	0.182904	0.248453	0.267072	0.295728	0.201861	0.206601	0.231674	0.181168	0.244915	0.122104	0.309635	0.139176	0.199472	0.218677	0.176358	0.153884	0.144094	0.234015	0.219622	0.246333	0.18344	0.268051	0.255069	0.188061	0.224716	0.376595	0.175682	0.231629	0.301195	0.184858	0.0283753	0.178571	0.0634556	0.149945	0.146491
G66	b4	9	free	0.30179	0.79711	0.378605	0.00844	0.243632	0.0781951	0.204863	0.267143	0.18146	0.148972	0.274032	0.290112	0.234483	0.240525	0.181271	0.24651	0.252967	0.239643	0.205712	0.226336	0.221451	0.269137	0.232679	0.247144	0.344311	0.191793	0.0800695	0.0763207	0.219499	0.281975	0.304025	0.256573	0.246308	0.25336	0.237256	0.245117	0.311643	0.236355	0.218382	0.160934	0.111583	0.110522	0.187567	0.158484	0.18174	0.0356451
G66	b5	7	free	0.18099	0.69458	0.260575	0.01052	0.213738	0.0616759	0.308869	0.274676	0.109457	0.149009	0.193372	0.226641	0.210082	0.215908	0.212578	0.279188	0.105456	0.231964	0.171968	0.193372	0.261741	0.225643	0.211143	0.224126	0.27146	0.185157	0.0825917	0.0407601	0.18809	0.250292	0.23006	0.303769	0.300175	0.19949	0.181746	0.174172	0.288219	0.182282	0.256424	0.229894	0.160926	0.0283159	0.239099	0.104814	0.145963	0.164529
G66	b6	7	free	0.1532	0.6367	0.240616	0.00756	0.202509	0.0866938	0.255845	0.240062	0.23005	0.134584	0.21341	0.219501	0.196221	0.219499	0.118794	0.141539	0.172925	0.213359	0.192606	0.235021	0.259491	0.207837	0.19895	0.227587	0.241343	0.182063	0.0822388	0.0911488	0.206227	0.1901	0.198708	0.247925	0.212582	0.181485	0.20609	0.179037	0.314385	0.228404	0.207837	0.182071	0.124804	0.0187666	0.249191	0.143934	0.115035	0.122845
G66	b7	8	free	0.12949	0.5937	0.218107	0.00713	0.21903	0.147761	0.266368	0.230527	0.118713	0.144661	0.179046	0.193921	0.187357	0.247929	0.233311	0.137335	0.235941	0.247942	0.215914	0.291456	0.138832	0.32921	0.221976	0.225166	0.208357	0.210779	0.153976	0.141545	0.288213	0.181261	0.168063	0.193919	0.126683	0.212431	0.223738	0.23298	0.327429	0.190923	0.219499	0.276979	0.183032	0.053238	0.175177	0.0279545	0.174004	0.177946
G66	b8	8	free	0.21344	0.8037	0.265572	0.00559	0.240746	0.139419	0.2379	0.200615	0.245967	0.148244	0.211891	0.306335	0.19949	0.200315	0.281629	0.255122	0.226641	0.298314	0.27271	0.357256	0.262886	0.27271	0.236974	0.165712	0.170143	0.133814	0.0965562	0.182282	0.354848	0.247346	0.153782	0.19757	0.301309	0.290112	0.279644	0.191946	0.168523	0.272288	0.189019	0.272384	0.137696	0.208536	0.121629	0.154803	0.146431	0.168
G66	c9	6	free	0.12408	0.6023	0.20601	0.00977	0.20208	0.106309	0.234232	0.206134	0.0613126	0.13673	0.122128	0.201805	0.220758	0.191538	0.212033	0.162472	0.191282	0.262731	0.177984	0.190055	0.184017	0.203292	0.187322	0.219204	0.268893	0.237764	0.114885	0.0977334	0.20751	0.182804	0.249291	0.225223	0.191695	0.199666	0.181505	0.237277	0.200833	0.24788	0.215674	0.222873	0.165964	0.0443707	0.207567	0.0312145	0.160475	0.12644
G66	c10	8	free	0.20159	0.67462	0.29882	0.01458	0.242129	0.17207	0.283437	0.232969	0.232405	0.16683	0.246817	0.197113	0.235831	0.111784	0.283121	0.183641	0.208266	0.293929	0.204296	0.331881	0.237157	0.292674	0.225132	0.260239	0.312265	0.249915	0.142388	0.201751	0.289251	0.294533	0.20539	0.151155	0.247458	0.278016	0.239923	0.257039	0.247605	0.159198	0.238583	0.284133	0.175946	0.0533491	0.263514	0.215443	0.146775	0.139623
G7	a1	8	free	0.23204	1.0397	0.22318	0.01356	0.265691	0.13932	0.309616	0.270121	0.258999	0.165168	0.195454	0.273545	0.244946	0.201853	0.346399	0.316842	0.289229	0.335042	0.229443	0.300892	0.17411	0.28075	0.209227	0.306282	0.291491	0.255546	0.115386	0.163253	0.250361	0.282393	0.294698	0.253008	0.283541	0.258606	0.366232	0.303264	0.246237	0.228456	0.298847	0.219119	0.218926	0.0417331	0.224011	0.127043	0.180352	0.154808
G7	a2	8	free	0.26116	1.04926	0.248899	0.00651	0.268145	0.131862	0.256615	0.349371	0.371645	0.191819	0.247058	0.316688	0.398306	0.346364	0.247609	0.206615	0.200415	0.296499	0.1584	0.31955	0.18329	0.308954	0.344681	0.233295	0.279179	0.203415	0.13062	0.133105	0.244934	0.538607	0.253209	0.304441	0.266222	0.276117	0.23521	0.256029	0.325986	0.215157	0.228448	0.395106	0.144336	0.186222	0.200876	0.0329501	0.253002	0.0906333
G7	a3	7	tri	0.24293	1.11743	0.217401	0.02761	0.329719	0.129822	0.316335	0.355995	0.185091	0.176807	0.222686	0.291517	0.327901	0.298084	0.254458	0.160532	0.250361	0.313459	0.227913	0.436936	0.356514	0.472274	0.329765	0.487197	0.437045	0.408866	0.108991	0.150653	0.330669	0.302963	0.266259	0.292644	0.265641	0.311763	0.225975	0.326369	0.316224	0.243553	0.51215	0.24644	0.248546	0.0506022	0.210542	0.0515991	0.191798	0.214631
G7	a4	7	free	0.21917	1.02087	0.214689	0.01786	0.280198	0.104654	0.345047	0.31415	0.228864	0.171409	0.233644	0.218003	0.307823	0.303777	0.330416	0.184725	0.221025	0.281522	0.212912	0.321619	0.255258	0.281371	0.190574	0.398122	0.391978	0.350401	0.0689319	0.140377	0.233643	0.34649	0.282523	0.319547	0.285418	0.259083	0.208387	0.332242	0.285449	0.315781	0.305114	0.202409	0.128006	0.14376	0.213624	0.0590141	0.239022	0.186056
G7	b5	8	free	0.24038	0.85831	0.280062	0.02201	0.265911	0.120602	0.339066	0.287087	0.397822	0.174285	0.205444	0.194812	0.340576	0.147746	0.278213	0.192752	0.238359	0.33909	0.260921	0.336249	0.33783	0.353804	0.255831	0.267099	0.278341	0.227507	0.117101	0.124104	0.270128	0.279882	0.208299	0.216359	0.273169	0.282198	0.308025	0.252559	0.317339	0.168738	0.334767	0.216092	0.16954	0.0908582	0.282948	0.15921	0.15595	0.173174
G7	b6	8	free	0.25467	0.97347	0.261611	0.02269	0.247135	0.128723	0.301266	0.307402	0.204687	0.172668	0.173682	0.230938	0.236718	0.233914	0.375306	0.291404	0.252285	0.319817	0.207327	0.280543	0.221064	0.301563	0.192156	0.187503	0.291038	0.158897	0.112879	0.144567	0.218499	0.31216	0.265347	0.313183	0.243389	0.286975	0.352046	0.211953	0.2648	0.209375	0.339465	0.193611	0.191553	0.0591216	0.203923	0.132869	0.191996	0.17165
G7	b7	7	free	0.24754	1.00981	0.245135	0.01177	0.23817	0.0838676	0.349917	0.276836	0.31163	0.175549	0.185357	0.15425	0.32112	0.247153	0.293987	0.177656	0.227512	0.254743	0.18531	0.287819	0.188628	0.319174	0.198369	0.204448	0.272569	0.292633	0.0612297	0.106505	0.229847	0.313652	0.287308	0.287104	0.287786	0.227508	0.211734	0.317712	0.261806	0.257475	0.244782	0.213367	0.143487	0.182619	0.231366	0.04063	0.22563	0.208821
G7	c8	8	free	0.32207	1.53839	0.209355	0.03382	0.315745	0.139934	0.441307	0.348462	0.417222	0.199491	0.271273	0.266826	0.326811	0.1565	0.36797	0.187718	0.246106	0.376239	0.204301	0.376242	0.368798	0.500621	0.494461	0.325356	0.277444	0.305251	0.139728	0.140141	0.302925	0.346627	0.273608	0.28382	0.314527	0.329417	0.302869	0.27635	0.333116	0.360438	0.430284	0.349945	0.190006	0.0706921	0.274133	0.220606	0.277021	0.236098
G7	c9	8	free	0.42097	1.4144	0.297632	0.03995	0.324872	0.14305	0.400592	0.366703	0.476018	0.229306	0.247453	0.336659	0.347383	0.239987	0.341806	0.2193	0.236534	0.383836	0.273878	0.43412	0.371918	0.480988	0.201229	0.462844	0.349952	0.270058	0.15622	0.12988	0.290908	0.396389	0.290413	0.377353	0.28564	0.330999	0.358748	0.343364	0.303112	0.273878	0.389958	0.277646	0.220405	0.103375	0.283976	0.144708	0.283615	0.206823
G7	c10	7	free	0.43732	1.20367	0.363322	0.03558	0.269804	0.10245	0.432797	0.318187	0.0634086	0.194224	0.19474	0.258405	0.263395	0.289857	0.271763	0.249315	0.247571	0.357296	0.193841	0.290854	0.273029	0.298643	0.23432	0.277438	0.337345	0.279055	0.0841209	0.120779	0.262464	0.284582	0.289867	0.31817	0.283773	0.303441	0.262073	0.300674	0.328354	0.266996	0.34164	0.295775	0.221585	0.105586	0.23793	0.0629081	0.163449	0.218833
G8	a1	8	free	0.14721	0.74281	0.19818	0.00707	0.219276	0.0788607	0.260206	0.222539	0.527572	0.174654	0.229441	0.263118	0.133882	0.142465	0.247386	0.197332	0.150969	0.232296	0.203642	0.309429	0.207886	0.191661	0.337586	0.284934	0.255171	0.121219	0.070936	0.0867854	0.213296	0.227829	0.218948	0.220911	0.25889	0.210173	0.234931	0.219241	0.233522	0.253431	0.207892	0.246983	0.129707	0.122805	0.234934	0.0867799	0.19305	0.147466
G8	a2	8	free	0.19978	0.94274	0.211914	0.01682	0.270626	0.0977761	0.281459	0.268938	0.237494	0.182563	0.356436	0.317603	0.216882	0.18671	0.190941	0.237077	0.247306	0.277773	0.207317	0.403722	0.279397	0.315781	0.226173	0.317863	0.310497	0.238546	0.0977253	0.0978269	0.28298	0.242214	0.364288	0.270306	0.292492	0.29606	0.267263	0.317542	0.249345	0.222733	0.313889	0.214795	0.154815	0.16292	0.260691	0.142466	0.168673	0.165431
G8	a3	8	free	0.20265	0.93771	0.216112	0.02873	0.299123	0.100771	0.251013	0.265841	0.21985	0.149183	0.33025	0.350167	0.178976	0.249603	0.236654	0.212903	0.278702	0.32487	0.299538	0.388325	0.332251	0.322601	0.314997	0.293468	0.360745	0.311922	0.0815429	0.12	0.27906	0.247726	0.270642	0.249645	0.25803	0.308003	0.266991	0.277124	0.274815	0.276488	0.291178	0.266135	0.165429	0.101148	0.283379	0.0388078	0.203293	0.141495
G8	a4	8	free	0.21095	0.9517	0.221656	0.00996	0.271644	0.0936377	0.243461	0.252646	0.148929	0.146192	0.321541	0.295993	0.241265	0.252886	0.218276	0.272399	0.253721	0.273818	0.188283	0.314377	0.231148	0.284865	0.27004	0.2879	0.33119	0.3086	0.0853953	0.10188	0.240163	0.220409	0.277617	0.25689	0.292465	0.295989	0.252419	0.302832	0.245639	0.267404	0.287646	0.2673	0.16692	0.0303052	0.228592	0.0772664	0.204678	0.116037
G8	b5	7	free	0.23271	0.97607	0.238415	0.01286	0.244941	0.0992399	0.386849	0.263643	0.29602	0.190317	0.217033	0.253128	0.256005	0.175566	0.260786	0.175566	0.187901	0.36002	0.178046	0.367387	0.207142	0.269313	0.393285	0.216707	0.206244	0.194928	0.127107	0.0713726	0.264498	0.296742	0.25728	0.24265	0.325772	0.201097	0.305235	0.30803	0.250253	0.253771	0.264926	0.302019	0.171575	0.0514658	0.258387	0.114284	0.192026	0.179705
G8	b6	8	free	0.25972	1.00175	0.259266	0.01516	0.268558	0.0962222	0.279898	0.275903	0.21924	0.166389	0.269081	0.287921	0.248951	0.204122	0.266921	0.24639	0.226404	0.289023	0.207142	0.315473	0.237862	0.312487	0.314089	0.302958	0.306396	0.261714	0.0952106	0.0972338	0.248745	0.286889	0.279162	0.255091	0.30647	0.290595	0.271422	0.275778	0.311742	0.255101	0.249891	0.290595	0.185565	0.0416116	0.243321	0.119929	0.20312	0.138159
G8	b7	8	free	0.22227	0.91432	0.243099	0.0174	0.265686	0.11099	0.321629	0.25672	0.191013	0.16763	0.226806	0.214587	0.216707	0.230907	0.218529	0.185115	0.215994	0.326801	0.236655	0.347589	0.371034	0.314704	0.30693	0.321263	0.308511	0.208852	0.113649	0.10833	0.236826	0.285515	0.221584	0.231384	0.373764	0.218346	0.237481	0.2845	0.266654	0.323599	0.243328	0.294257	0.176088	0.0526398	0.23471	0.0670998	0.226093	0.18055
G8	b8	8	free	0.22633	0.83079	0.272427	0.01554	0.238063	0.0712762	0.366696	0.243652	0.409299	0.175203	0.233016	0.275152	0.221584	0.264924	0.194923	0.13466	0.249884	0.320982	0.19493	0.275778	0.15426	0.208075	0.33587	0.200449	0.239949	0.304568	0.0646272	0.0779253	0.307626	0.224466	0.217822	0.243068	0.274186	0.267265	0.238332	0.274556	0.250704	0.257913	0.256369	0.258387	0.181672	0.0504681	0.278094	0.0230162	0.191549	0.208651
G8	c9	8	free	0.32016	1.25423	0.255264	0.02004	0.31009	0.0929614	0.300239	0.296918	0.225525	0.192554	0.270773	0.269074	0.3421	0.26473	0.241238	0.261179	0.302264	0.384991	0.306711	0.409487	0.376916	0.344019	0.371649	0.312862	0.314332	0.189121	0.0781063	0.107816	0.261541	0.286902	0.305035	0.292351	0.42443	0.291587	0.333379	0.302736	0.282098	0.353253	0.326319	0.286673	0.184893	0.133429	0.258102	0.0908722	0.237289	0.151529
G8	c10	8	free	0.37594	1.43887	0.261274	0.01878	0.349442	0.124821	0.353253	0.34272	0.228069	0.185735	0.389366	0.342369	0.381693	0.29374	0.354175	0.256459	0.282936	0.381184	0.311976	0.399117	0.395169	0.338613	0.301177	0.346038	0.436711	0.380355	0.108181	0.141461	0.34401	0.369551	0.354881	0.311934	0.293029	0.318857	0.289234	0.325956	0.354174	0.32377	0.335222	0.461795	0.197018	0.0784425	0.282195	0.08718	0.240095	0.157976
T2	a1	8	free	0.17021	0.66467	0.256082	0.0228	0.213646	0.0730822	0.294086	0.210939	0.110757	0.138174	0.194345	0.204915	0.233643	0.184224	0.214687	0.118163	0.182541	0.23593	0.154606	0.313844	0.208535	0.251535	0.231277	0.248955	0.221004	0.220132	0.0767713	0.069393	0.244912	0.208501	0.206596	0.19489	0.202639	0.290192	0.193295	0.258493	0.217886	0.245658	0.222479	0.241738	0.171385	0.0280957	0.184539	0.0824583	0.137807	0.178218
T2	a2	8	free	0.19028	0.84499	0.225186	0.02879	0.227728	0.0727188	0.305498	0.253609	0.298536	0.15712	0.170426	0.115951	0.25993	0.242812	0.161495	0.145418	0.23573	0.308244	0.1975	0.289793	0.280914	0.3046	0.261046	0.251843	0.219481	0.198469	0.0969584	0.0484792	0.219483	0.24752	0.206456	0.228086	0.292757	0.255909	0.189073	0.227073	0.31599	0.205189	0.22284	0.264231	0.194342	0.156824	0.179994	0.0555075	0.206321	0.151334
T2	a3	7	free	0.14396	0.63742	0.225848	0.01737	0.219953	0.0893542	0.346915	0.219609	0.159022	0.155074	0.172901	0.171665	0.192811	0.198612	0.144363	0.180948	0.151331	0.267961	0.246126	0.314282	0.199865	0.240414	0.247336	0.224893	0.304696	0.261049	0.0805674	0.098141	0.237556	0.177514	0.204813	0.227706	0.267849	0.232647	0.302947	0.168217	0.222095	0.215226	0.25112	0.307997	0.179017	0.03511	0.192504	0.110506	0.208132	0.185004
T2	a4	5	fused	0.09471	0.66379	0.142681	0.01308	0.21491	0.0587083	0.181799	0.243708	0.119925	0.138367	0.186195	0.254282	0.2218	0.231898	0.206457	0.15517	0.173119	0.26332	0.211799	0.251848	0.173895	0.183807	0.150119	0.258193	0.296691	0.219968	0.0707643	0.0466522	0.256358	0.230905	0.211842	0.263031	0.194352	0.176527	0.230401	0.189981	0.197252	0.245925	0.283644	0.202924	0.170718	0.0353821	0.2049	0.0490727	0.178696	0.124751
T2	a5	7	free	0.14307	0.66305	0.215776	0.01443	0.223185	0.0794535	0.321372	0.227025	0.12545	0.14073	0.159757	0.204813	0.153861	0.219473	0.263027	0.240259	0.253976	0.340648	0.223776	0.248609	0.24565	0.239449	0.219954	0.180954	0.190548	0.186202	0.0693899	0.0895172	0.176913	0.207157	0.211071	0.275472	0.236214	0.263391	0.263031	0.267852	0.242772	0.237152	0.182699	0.226735	0.094948	0.118163	0.165199	0.0615966	0.180421	0.149988
T2	b6	5	free	0.20158	0.85141	0.23676	0.02535	0.238979	0.0870323	0.243789	0.247481	0.0715568	0.151613	0.196015	0.270056	0.222336	0.237516	0.223498	0.24735	0.308031	0.307553	0.178707	0.271678	0.203372	0.232559	0.199416	0.234604	0.262239	0.228741	0.0865399	0.0875247	0.251179	0.292045	0.247941	0.219741	0.212778	0.209651	0.358647	0.24421	0.225838	0.220405	0.2523	0.288155	0.211505	0.0398871	0.233352	0.0331832	0.1952	0.0995587
T2	b7	8	free	0.18105	0.98273	0.184232	0.02452	0.273759	0.0974193	0.29766	0.282052	0.242918	0.154415	0.234604	0.223487	0.266404	0.214784	0.286617	0.203069	0.278792	0.332779	0.2371	0.331709	0.253408	0.351379	0.31661	0.317218	0.279932	0.252253	0.0797717	0.115067	0.297845	0.32106	0.183639	0.302697	0.207124	0.264239	0.376782	0.252294	0.283546	0.249126	0.220902	0.284098	0.180078	0.111174	0.213634	0.0713483	0.152397	0.14423
T2	b8	7	free	0.21884	0.99479	0.219986	0.02734	0.261557	0.148696	0.324261	0.262295	0.156467	0.167556	0.248138	0.262237	0.199666	0.26349	0.264414	0.294594	0.244363	0.330667	0.233974	0.311968	0.269145	0.326538	0.262936	0.259561	0.24043	0.172798	0.108046	0.189346	0.297848	0.234556	0.225666	0.289012	0.300506	0.293668	0.2983	0.288457	0.271185	0.22458	0.254429	0.270047	0.203071	0.0579067	0.199666	0.0422706	0.183834	0.168055
T2	b9	6	tri	0.25107	0.82392	0.304726	0.0257	0.244045	0.074244	0.274987	0.295515	0.129203	0.170155	0.175669	0.246465	0.247795	0.173982	0.226962	0.170008	0.27213	0.301932	0.185892	0.303509	0.32852	0.332779	0.290366	0.218167	0.249126	0.181426	0.106214	0.0422741	0.231873	0.250304	0.233352	0.350393	0.264417	0.223498	0.220627	0.214039	0.332783	0.171516	0.248582	0.333765	0.218676	0.0611869	0.247399	0.0841053	0.207831	0.155333
T2	b10	6	free	0.15648	0.92243	0.169639	0.02048	0.252489	0.10423	0.310423	0.273471	0.246447	0.162762	0.165938	0.188376	0.213237	0.233351	0.220627	0.241233	0.303216	0.336422	0.261394	0.30014	0.298877	0.290996	0.21093	0.310525	0.274952	0.18961	0.0846807	0.123779	0.225612	0.301932	0.219684	0.243607	0.285379	0.262943	0.263725	0.319873	0.293917	0.202104	0.254429	0.247548	0.217726	0.0793046	0.183307	0.0805292	0.177339	0.163923
T3	b1	7	free	0.3366	1.47912	0.227568	0.02229	0.366763	0.119645	0.328431	0.301784	0.184749	0.1761	0.306108	0.269278	0.320857	0.280615	0.374326	0.341032	0.324708	0.501742	0.427438	0.518156	0.331336	0.365508	0.327403	0.411138	0.392958	0.375612	0.130404	0.108887	0.399744	0.25347	0.280984	0.32086	0.378179	0.396845	0.446172	0.248099	0.321781	0.280208	0.311024	0.377769	0.179883	0.0678776	0.255659	0.0978686	0.194995	0.184432
T3	b2	8	free	0.36196	1.47247	0.245818	0.02832	0.349672	0.10189	0.342783	0.335614	0.275526	0.199915	0.415893	0.371447	0.407064	0.301266	0.428133	0.310527	0.327048	0.405788	0.259127	0.378693	0.319363	0.371439	0.249352	0.365543	0.361562	0.322512	0.117131	0.0866496	0.37183	0.325777	0.334601	0.37612	0.290053	0.379921	0.342998	0.302973	0.317329	0.413743	0.323231	0.330394	0.193407	0.0888575	0.224899	0.161687	0.252665	0.16912
T3	b3	8	free	0.37491	1.33336	0.281177	0.04481	0.3195	0.0995085	0.387264	0.325851	0.157043	0.182716	0.274929	0.320211	0.298151	0.27774	0.305824	0.230751	0.267682	0.36235	0.279417	0.389382	0.386309	0.375267	0.290189	0.34149	0.381595	0.330711	0.081559	0.117458	0.285328	0.313022	0.294952	0.371382	0.336906	0.271383	0.328154	0.300354	0.338294	0.327285	0.280708	0.332269	0.178724	0.0651557	0.210827	0.10684	0.264421	0.254594
T3	b4	8	free	0.35588	1.37105	0.259567	0.03127	0.342565	0.105539	0.321791	0.349782	0.174153	0.174951	0.341147	0.360416	0.343945	0.329923	0.405554	0.241287	0.319596	0.36005	0.307384	0.428412	0.31692	0.399123	0.350466	0.288753	0.350803	0.337258	0.0999614	0.111116	0.386971	0.383991	0.241712	0.378693	0.321174	0.328979	0.347247	0.328156	0.330115	0.264765	0.306328	0.314006	0.170653	0.145695	0.227196	0.10239	0.18763	0.179878
T3	b5	8	free	0.38358	1.39305	0.275353	0.02827	0.328915	0.0968397	0.332953	0.353679	0.443144	0.201504	0.302245	0.328349	0.354297	0.249511	0.369847	0.337378	0.337685	0.375608	0.254593	0.386715	0.434974	0.376499	0.220899	0.356627	0.303571	0.273841	0.11602	0.0776594	0.316666	0.321303	0.293506	0.410986	0.312353	0.352644	0.334601	0.338908	0.327409	0.315485	0.355019	0.277047	0.190096	0.050878	0.297456	0.148335	0.224091	0.14409
T3	c6	8	free	0.24641	1.24211	0.19838	0.02034	0.29346	0.128662	0.247955	0.305014	0.130596	0.162954	0.28756	0.290231	0.320416	0.269869	0.326964	0.255665	0.277779	0.348554	0.248351	0.29437	0.257819	0.363186	0.295034	0.274944	0.31578	0.268843	0.129244	0.12808	0.291578	0.306299	0.240192	0.304828	0.288799	0.329561	0.306975	0.294722	0.294722	0.31578	0.314208	0.273642	0.194918	0.0678823	0.219387	0.0698891	0.212559	0.110504
T3	c7	7	free	0.31413	1.27386	0.246597	0.04716	0.316783	0.154494	0.350737	0.288579	0.15015	0.175429	0.298219	0.317817	0.349907	0.287079	0.304828	0.327598	0.29899	0.347859	0.241579	0.328125	0.29386	0.374061	0.351582	0.311261	0.367098	0.268671	0.169706	0.139283	0.35533	0.295736	0.25991	0.31259	0.333246	0.34961	0.30735	0.30735	0.277447	0.271911	0.268543	0.426309	0.2016	0.0758947	0.211036	0.0804627	0.20097	0.168274
T3	c8	7	tri	0.24086	1.12937	0.213269	0.02004	0.299857	0.0892912	0.276652	0.325334	0.216387	0.168091	0.302095	0.351188	0.269228	0.270253	0.344832	0.346133	0.286396	0.34829	0.263126	0.320847	0.240192	0.299337	0.217647	0.2596	0.381653	0.296902	0.0825823	0.096	0.250337	0.258488	0.33466	0.38788	0.274944	0.336171	0.310371	0.268843	0.320308	0.323315	0.33466	0.218176	0.131803	0.0673712	0.235396	0.166623	0.161354	0.133454
T3	c9	8	free	0.2659	1.27056	0.209278	0.03244	0.320564	0.131584	0.350023	0.310074	0.0901172	0.162698	0.311446	0.317127	0.374338	0.341644	0.3202	0.298219	0.269185	0.342822	0.267769	0.296864	0.283363	0.388919	0.274944	0.350531	0.338085	0.353575	0.132065	0.131102	0.324879	0.353672	0.28563	0.297948	0.303047	0.346565	0.340834	0.251668	0.298682	0.28816	0.289993	0.314464	0.177015	0.0773977	0.178635	0.0875918	0.193196	0.176624
T3	c10	8	free	0.26466	1.13493	0.233195	0.03318	0.297545	0.104151	0.394826	0.319663	0.168503	0.17544	0.221633	0.226059	0.245223	0.336856	0.277322	0.183722	0.279886	0.377037	0.2016	0.350433	0.336856	0.422509	0.40197	0.303009	0.318287	0.278317	0.092205	0.116097	0.288799	0.24	0.2784	0.380292	0.265045	0.275948	0.308771	0.327598	0.332172	0.289436	0.326188	0.27699	0.206456	0.0576	0.240432	0.10384	0.231696	0.164326
FJ7	a1	8	free	0.11008	0.7968	0.138153	0.0234	0.266705	0.0715541	0.319787	0.248576	0.223382	0.152572	0.228346	0.294736	0.251032	0.269514	0.219155	0.208046	0.255374	0.318736	0.172672	0.334111	0.314711	0.370849	0.193863	0.277041	0.290519	0.268569	0.07709	0.0660182	0.310201	0.212533	0.170756	0.186951	0.311067	0.231437	0.22329	0.266148	0.284615	0.26209	0.310206	0.188114	0.131504	0.0560839	0.154437	0.036558	0.147704	0.152019
FJ7	a2	8	free	0.13459	0.67343	0.199857	0.01445	0.250128	0.0622645	0.284009	0.235268	0.0652358	0.123959	0.208034	0.280108	0.281285	0.259573	0.227854	0.152421	0.241865	0.31235	0.176841	0.26687	0.266602	0.303945	0.286569	0.24485	0.235657	0.257224	0.0693584	0.0551707	0.313395	0.250418	0.180533	0.221443	0.231205	0.193716	0.22672	0.227854	0.228886	0.222606	0.240323	0.246785	0.120999	0.0631494	0.172072	0.016347	0.150735	0.131578
FJ7	a3	7	free	0.1423	0.71394	0.199316	0.02741	0.261249	0.0728723	0.282079	0.245074	0.164278	0.130461	0.223344	0.253688	0.270318	0.259564	0.205302	0.206796	0.273427	0.320702	0.250096	0.273905	0.324483	0.259564	0.247442	0.249026	0.296964	0.265371	0.0641247	0.08162	0.197543	0.208634	0.207248	0.273003	0.283973	0.234259	0.210058	0.316925	0.264394	0.228028	0.234264	0.205053	0.124506	0.0387395	0.190337	0.0933678	0.138137	0.145737
FJ7	a4	8	free	0.1202	0.87737	0.137	0.01986	0.237386	0.0967699	0.185308	0.254977	0.123638	0.134483	0.228028	0.271644	0.232855	0.250418	0.202228	0.208876	0.287428	0.239419	0.179549	0.213891	0.199209	0.246699	0.199716	0.248071	0.305928	0.284223	0.0847098	0.10883	0.265714	0.313794	0.17237	0.232451	0.229874	0.258105	0.212004	0.168753	0.245448	0.291931	0.228217	0.230896	0.1899	0.0304239	0.169295	0.0553457	0.18257	0.119287
FJ7	a5	6	free	0.10595	0.57116	0.1855	0.01575	0.201559	0.0656996	0.280406	0.231232	0.115798	0.125606	0.191361	0.282341	0.185905	0.211374	0.218879	0.149915	0.174977	0.213891	0.0866303	0.154771	0.191785	0.243046	0.188712	0.218117	0.286349	0.226901	0.0644474	0.0669517	0.20843	0.214471	0.18137	0.250172	0.177082	0.196864	0.17967	0.162227	0.222322	0.179556	0.237961	0.267258	0.132744	0.0304239	0.141217	0.0568142	0.138434	0.119707
FJ7	b6	8	free	0.12079	0.69348	0.17418	0.01575	0.247679	0.0738152	0.221135	0.260434	0.317181	0.15309	0.24021	0.257786	0.344954	0.297396	0.185735	0.221579	0.207837	0.243194	0.156299	0.234977	0.247728	0.241255	0.201333	0.289676	0.375191	0.217718	0.0719622	0.0756681	0.252042	0.304242	0.222646	0.231627	0.217711	0.217351	0.241505	0.178218	0.201333	0.184635	0.304534	0.27329	0.145431	0.0500207	0.186991	0.166425	0.20337	0.115025
FJ7	b7	8	free	0.12028	0.73459	0.163738	0.01749	0.238239	0.0732383	0.267168	0.25913	0.496952	0.164671	0.169447	0.252349	0.201099	0.15423	0.2511	0.273426	0.269681	0.295511	0.214455	0.276979	0.345913	0.325746	0.119034	0.165716	0.209476	0.28767	0.0668966	0.07958	0.198597	0.279196	0.177558	0.293926	0.257523	0.266919	0.236965	0.219546	0.191946	0.211337	0.271453	0.268561	0.156998	0.148551	0.155743	0.165954	0.15031	0.13271
FJ7	b8	7	free	0.12415	0.69381	0.178939	0.02342	0.240756	0.0751658	0.2968	0.262798	0.0654758	0.128421	0.254158	0.262783	0.273426	0.229932	0.197165	0.159407	0.244126	0.326106	0.168058	0.165541	0.20971	0.268228	0.219906	0.268925	0.323826	0.280795	0.0690567	0.0812749	0.228226	0.283088	0.169855	0.185895	0.299491	0.221051	0.257032	0.160191	0.25478	0.176069	0.327429	0.198942	0.105456	0.0515542	0.170656	0.06376	0.141746	0.123875
FJ7	b9	8	free	0.13608	0.76944	0.176856	0.02648	0.227131	0.0674978	0.309468	0.268987	0.0677767	0.144399	0.225651	0.218382	0.226641	0.220965	0.223206	0.172425	0.280795	0.315608	0.166658	0.209619	0.234685	0.245677	0.195424	0.208536	0.263267	0.226551	0.0614183	0.0735773	0.195826	0.265307	0.156801	0.275739	0.258858	0.18767	0.231675	0.254165	0.2511	0.217536	0.283803	0.205667	0.107656	0.0772143	0.159397	0.0469994	0.186525	0.154728
FJ7	b10	7	free	0.11223	0.82516	0.13601	0.02779	0.25375	0.0867164	0.284434	0.307698	0.222324	0.129644	0.203993	0.189896	0.262444	0.255081	0.26619	0.160934	0.262449	0.308838	0.196331	0.300175	0.218386	0.37454	0.312174	0.281016	0.231421	0.236138	0.0760643	0.0973686	0.280868	0.26618	0.144014	0.335127	0.252033	0.198163	0.226641	0.243521	0.330282	0.0946122	0.299203	0.156431	0.120759	0.0815203	0.176177	0.0395426	0.165186	0.140501
T6	a1	5	tri	0.20065	0.70703	0.283793	0.02554	0.208788	0.0786466	0.325978	0.219453	0.177255	0.152895	0.17388	0.224503	0.262962	0.302211	0.208632	0.147801	0.172673	0.267373	0.144175	0.276006	0.159558	0.211816	0.200168	0.17803	0.228175	0.182637	0.0780749	0.0792182	0.250748	0.208735	0.241566	0.280076	0.276015	0.20954	0.199373	0.300419	0.183508	0.169933	0.205495	0.321994	0.182637	0.0540112	0.209407	0.0608015	0.161251	0.144439
T6	a2	5	fused	0.20782	0.83777	0.248063	0.04419	0.221897	0.0789967	0.272848	0.256158	0.0733306	0.153613	0.156982	0.259329	0.230786	0.255718	0.216849	0.16119	0.17595	0.282739	0.19306	0.221952	0.180214	0.214766	0.180211	0.246032	0.334451	0.240116	0.0740007	0.0839927	0.225002	0.254184	0.246568	0.287364	0.246886	0.224998	0.203346	0.232462	0.207432	0.25793	0.275651	0.305104	0.163953	0.0627394	0.212952	0.104363	0.159749	0.141368
T6	a3	5	free	0.21286	0.78893	0.269808	0.03278	0.196221	0.101666	0.377026	0.253232	0.182542	0.167224	0.142284	0.139237	0.21407	0.187966	0.228034	0.16486	0.175266	0.23878	0.144163	0.232342	0.228385	0.243962	0.196749	0.182361	0.202705	0.218367	0.0727663	0.130566	0.240125	0.241565	0.206085	0.297605	0.283373	0.240247	0.259511	0.220696	0.28075	0.225923	0.19301	0.262536	0.148001	0.131476	0.213274	0.077174	0.192596	0.20569
T6	a4	6	tri	0.20695	0.71998	0.287439	0.01717	0.206927	0.0956327	0.27132	0.247306	0.060224	0.154194	0.216067	0.21625	0.197968	0.190088	0.189457	0.219462	0.18104	0.258408	0.182637	0.276006	0.196287	0.255798	0.192024	0.184649	0.207092	0.1476	0.103207	0.0880579	0.245911	0.301913	0.167565	0.262965	0.225658	0.262394	0.268565	0.190971	0.215047	0.201963	0.209299	0.278829	0.18377	0.0632252	0.221372	0.0769048	0.183346	0.132082
T6	a5	5	fused	0.14947	0.74878	0.199618	0.03633	0.232078	0.0874024	0.15863	0.24227	0.176952	0.1355	0.170226	0.212946	0.19852	0.17532	0.241939	0.248458	0.250539	0.260666	0.222362	0.299822	0.224993	0.208632	0.187175	0.208721	0.336115	0.26681	0.102038	0.0727663	0.281496	0.223522	0.221952	0.225658	0.204277	0.210538	0.225524	0.232472	0.236423	0.226238	0.283477	0.217725	0.205934	0.0621129	0.183292	0.0299857	0.170235	0.107662
T6	b6	5	fused	0.20571	0.89896	0.228831	0.03212	0.2432	0.0758467	0.232631	0.262293	0.159797	0.161105	0.219228	0.210019	0.291724	0.238128	0.240438	0.232946	0.198978	0.31115	0.21469	0.306322	0.239255	0.252165	0.182531	0.255322	0.262037	0.236265	0.048913	0.10278	0.288878	0.282722	0.233971	0.273137	0.300261	0.274948	0.237226	0.23027	0.20628	0.239684	0.287033	0.271486	0.206983	0.0477469	0.195725	0.14364	0.228099	0.107196
T6	b7	5	fused	0.21223	0.97855	0.216882	0.0395	0.241179	0.0798535	0.405939	0.269206	0.208572	0.172652	0.16493	0.212477	0.287628	0.270856	0.365871	0.235933	0.222135	0.310284	0.159361	0.240438	0.204797	0.270852	0.237455	0.212736	0.256116	0.206989	0.0608437	0.0988632	0.280599	0.261698	0.29781	0.282722	0.215693	0.269519	0.327555	0.240582	0.280595	0.232024	0.25181	0.25541	0.182097	0.0922505	0.199771	0.09176	0.171372	0.202581
T6	b8	7	fused	0.1749	0.97338	0.179683	0.03205	0.282091	0.0967752	0.175064	0.306134	0.115481	0.152322	0.251853	0.270525	0.268519	0.324539	0.260448	0.218602	0.204355	0.291722	0.252213	0.381334	0.256255	0.323148	0.298227	0.295946	0.32724	0.288535	0.0907701	0.10278	0.295534	0.282875	0.240865	0.329744	0.275611	0.30172	0.195897	0.222434	0.261493	0.305035	0.350425	0.246418	0.18723	0.0813268	0.223345	0.0489178	0.20628	0.11422
T6	b9	5	fused	0.14815	0.91857	0.161283	0.03343	0.273815	0.087184	0.102928	0.278685	0.182758	0.147425	0.203351	0.283365	0.195901	0.223654	0.260445	0.215483	0.234691	0.329057	0.286051	0.399908	0.278858	0.34657	0.321189	0.2691	0.280481	0.252928	0.0913904	0.0829775	0.190036	0.332212	0.214643	0.334641	0.223502	0.223512	0.266438	0.234696	0.233236	0.302174	0.214651	0.299659	0.21757	0.0766113	0.248926	0.0806243	0.211679	0.04752
T6	b10	6	tri	0.23763	0.90724	0.261926	0.03539	0.251399	0.0975192	0.338314	0.274138	0.290638	0.16633	0.218612	0.246555	0.336661	0.274946	0.251045	0.187419	0.209266	0.269848	0.185049	0.337865	0.193915	0.305289	0.292302	0.267457	0.256949	0.189212	0.0809096	0.114129	0.290792	0.333966	0.198417	0.266738	0.302433	0.299358	0.267501	0.244579	0.240438	0.220094	0.25541	0.303556	0.182776	0.051393	0.220102	0.100673	0.195667	0.218034
PP18	a1	6	tri	0.19173	0.70096	0.273525	0.01955	0.245899	0.0678911	0.263254	0.233455	0.188487	0.138873	0.255373	0.305426	0.246581	0.268452	0.223061	0.240487	0.248069	0.278415	0.157403	0.215472	0.234081	0.295298	0.268144	0.246367	0.255575	0.196178	0.09522	0.0405623	0.2766	0.239419	0.268599	0.221453	0.229466	0.223296	0.245227	0.25974	0.227716	0.237917	0.245233	0.257665	0.158381	0.0448871	0.196874	0.0488342	0.157207	0.111166
PP18	a2	6	tri	0.18908	0.64582	0.292775	0.01332	0.261923	0.109359	0.231419	0.274703	0.174068	0.138814	0.265724	0.290519	0.285522	0.255543	0.292071	0.234608	0.285521	0.238949	0.179375	0.257352	0.244441	0.328019	0.263975	0.189471	0.277193	0.302479	0.106728	0.11199	0.278381	0.300675	0.3255	0.298207	0.275811	0.22307	0.241046	0.227266	0.274806	0.219354	0.225124	0.218123	0.172549	0.0770859	0.229433	0.0430165	0.180576	0.145383
PP18	a3	6	tri	0.162	0.6517	0.248581	0.0132	0.222711	0.0933967	0.158776	0.221355	0.072411	0.14007	0.200794	0.207248	0.183631	0.190346	0.19371	0.257824	0.24033	0.223296	0.219338	0.351527	0.194773	0.273762	0.188114	0.231209	0.215039	0.192439	0.095651	0.0911424	0.240491	0.262098	0.273909	0.249024	0.289708	0.24032	0.253039	0.218124	0.172069	0.164245	0.202228	0.227849	0.18189	0.10576	0.208034	0.102303	0.156024	0.136106
PP18	a4	6	fused	0.19839	0.89495	0.221677	0.02443	0.260348	0.0707029	0.215344	0.248815	0.18765	0.142768	0.235174	0.295255	0.23196	0.250832	0.206851	0.223981	0.272215	0.321398	0.223985	0.305698	0.249768	0.252833	0.223057	0.250172	0.318563	0.303834	0.0760094	0.0653964	0.288204	0.269526	0.2585	0.278415	0.2332	0.276603	0.225272	0.245904	0.205846	0.282812	0.241471	0.248572	0.180584	0.0384808	0.222929	0.0770859	0.21556	0.094355
PP18	a5	5	tri	0.14857	0.64683	0.229689	0.00929	0.24392	0.0844635	0.21401	0.204159	0.0742058	0.129954	0.219952	0.206109	0.201259	0.212392	0.157725	0.143387	0.191795	0.292635	0.20531	0.376469	0.334592	0.296508	0.332718	0.240665	0.263352	0.227851	0.077223	0.0917041	0.239465	0.154442	0.17237	0.178288	0.296814	0.213895	0.19951	0.319644	0.26891	0.283965	0.214996	0.224436	0.128249	0.0373966	0.181879	0.075061	0.203038	0.0953377
PP18	b6	6	tri	0.24051	0.94836	0.253606	0.02569	0.302366	0.0991153	0.231331	0.342511	0.314843	0.161765	0.275856	0.359514	0.238787	0.315388	0.275647	0.31212	0.270442	0.334354	0.208162	0.314469	0.259911	0.336268	0.297885	0.268546	0.385553	0.384947	0.0887086	0.109522	0.29067	0.351622	0.255135	0.295116	0.250275	0.260189	0.318205	0.296109	0.373021	0.228198	0.350287	0.256968	0.231074	0.0510241	0.229994	0.0489698	0.222352	0.03245
PP18	b7	7	free	0.28314	1.05199	0.269147	0.02835	0.262337	0.107456	0.321411	0.284493	0.209589	0.171232	0.359601	0.291575	0.313907	0.315069	0.183738	0.16226	0.205606	0.318163	0.189314	0.275432	0.242978	0.256561	0.21397	0.261035	0.320225	0.287953	0.121543	0.0933696	0.321631	0.308354	0.326731	0.26855	0.320216	0.200713	0.228011	0.283851	0.21744	0.32281	0.343628	0.302366	0.154702	0.110321	0.250907	0.0895381	0.193286	0.124525
PP18	b8	6	tri	0.28098	0.97063	0.289482	0.02393	0.295412	0.0978402	0.328491	0.293683	0.0795204	0.172628	0.265536	0.271788	0.246031	0.286723	0.259686	0.217704	0.283185	0.349742	0.212538	0.367847	0.302612	0.363398	0.329007	0.303083	0.364967	0.302752	0.102625	0.0930551	0.308687	0.259899	0.302178	0.29278	0.293927	0.298713	0.322821	0.303138	0.321631	0.23258	0.300423	0.279862	0.184218	0.0925844	0.21005	0.118125	0.19472	0.169415
PP18	b9	6	tri	0.34888	1.10705	0.315144	0.03127	0.324512	0.112307	0.352894	0.29523	0.179923	0.179175	0.249344	0.3083	0.21831	0.184222	0.238051	0.191841	0.315396	0.424556	0.322731	0.390123	0.372591	0.422039	0.355716	0.359593	0.460553	0.378822	0.124877	0.0997359	0.332059	0.312641	0.254274	0.222753	0.342086	0.273035	0.408399	0.358542	0.33153	0.303334	0.313997	0.326917	0.222023	0.111512	0.218039	0.0818483	0.195395	0.186276
PP18	c10	6	tri	0.23808	0.79185	0.300663	0.01573	0.243877	0.0859825	0.23527	0.256822	0.121777	0.148506	0.159672	0.165676	0.197659	0.209043	0.211828	0.228334	0.282767	0.30278	0.25301	0.355186	0.236908	0.346728	0.287596	0.208303	0.284557	0.171983	0.0796727	0.0922923	0.225377	0.247077	0.211828	0.221397	0.23904	0.241802	0.287324	0.257159	0.281239	0.262829	0.277574	0.205841	0.187629	0.0790674	0.165017	0.0911206	0.147723	0.175969
PP19	a1	6	tri	0.31554	1.3404	0.235407	0.02238	0.283766	0.1291	0.408002	0.337464	0.245416	0.212028	0.312325	0.235712	0.238675	0.17211	0.314657	0.29695	0.270497	0.365601	0.29696	0.37047	0.25833	0.25639	0.224108	0.242567	0.376656	0.308251	0.13327	0.124929	0.268637	0.295479	0.373453	0.37026	0.30682	0.288637	0.403274	0.314851	0.329971	0.255353	0.354146	0.269628	0.18605	0.141341	0.261691	0.260437	0.196822	0.240299
PP19	a2	7	tri	0.3359	1.30485	0.257424	0.04361	0.312787	0.115181	0.355652	0.328458	0.178717	0.188106	0.286895	0.316884	0.355906	0.269622	0.243917	0.274898	0.207319	0.293203	0.257974	0.361908	0.313319	0.401166	0.359693	0.380935	0.367637	0.313319	0.109763	0.120599	0.279574	0.311268	0.359185	0.361899	0.329963	0.323702	0.305861	0.337818	0.327345	0.257061	0.313323	0.349797	0.196267	0.0874437	0.289878	0.132806	0.252645	0.158119
PP19	a3	7	tri	0.31676	1.34589	0.235354	0.03293	0.309721	0.117012	0.348062	0.321801	0.105536	0.1763	0.319972	0.234727	0.219896	0.257781	0.296899	0.281182	0.305652	0.389805	0.297424	0.402338	0.334196	0.370808	0.302155	0.287282	0.348598	0.306829	0.108477	0.125547	0.273817	0.322407	0.221367	0.324336	0.307286	0.346433	0.279403	0.357042	0.342452	0.320843	0.29801	0.302362	0.22825	0.0854596	0.226253	0.089574	0.200036	0.189054
PP19	a4	8	tri	0.40001	1.40873	0.283951	0.04501	0.277175	0.122452	0.40506	0.324098	0.157136	0.209554	0.265422	0.292931	0.261872	0.212594	0.25487	0.206037	0.20459	0.380074	0.232381	0.326347	0.254434	0.348767	0.288364	0.280516	0.295211	0.330387	0.135132	0.109773	0.320852	0.313364	0.270267	0.30976	0.383386	0.271868	0.317678	0.311366	0.327918	0.316936	0.345349	0.304887	0.198954	0.0999388	0.32982	0.146658	0.2559	0.195869
PP19	a5	8	tri	0.43762	1.35669	0.322564	0.03824	0.29134	0.110957	0.334712	0.365905	0.208175	0.201124	0.298417	0.278063	0.332691	0.23757	0.291388	0.302418	0.296325	0.352338	0.26911	0.350865	0.292447	0.307747	0.266838	0.201913	0.307278	0.276032	0.115174	0.10674	0.299094	0.442641	0.281854	0.337495	0.359129	0.308503	0.32279	0.30682	0.387162	0.283231	0.296321	0.29442	0.222499	0.120599	0.250171	0.13967	0.251968	0.201442
PP19	b6	7	tri	0.34659	1.17028	0.29616	0.04022	0.285372	0.090984	0.314679	0.314621	0.147434	0.178822	0.233877	0.319521	0.363447	0.256581	0.30319	0.246406	0.25916	0.356483	0.286212	0.345765	0.323259	0.316797	0.266655	0.205909	0.277076	0.205613	0.102775	0.0791929	0.333236	0.326541	0.33301	0.340644	0.314574	0.276628	0.311441	0.298865	0.3154	0.250446	0.275899	0.234199	0.175314	0.0729275	0.284812	0.094107	0.242301	0.177872
PP19	b7	7	tri	0.27867	1.14328	0.243746	0.02456	0.256102	0.108177	0.275892	0.291263	0.175195	0.187738	0.212571	0.207557	0.226684	0.309788	0.291203	0.255656	0.2505	0.330323	0.251547	0.349795	0.170961	0.212269	0.287655	0.251689	0.25853	0.2309	0.099424	0.11693	0.326542	0.290224	0.301072	0.31541	0.281612	0.304276	0.257845	0.261479	0.303568	0.239697	0.255849	0.266786	0.175382	0.152589	0.194895	0.100186	0.240531	0.0782446
PP19	b8	8	tri	0.27513	1.05858	0.259905	0.01859	0.260855	0.0830894	0.374722	0.289481	0.311725	0.19809	0.227127	0.241783	0.250906	0.183697	0.355957	0.260653	0.283527	0.310478	0.11736	0.27371	0.213283	0.211328	0.304607	0.334249	0.309788	0.295232	0.0987903	0.0673885	0.277709	0.308168	0.266608	0.326655	0.252892	0.275082	0.241783	0.307504	0.237548	0.285556	0.285554	0.293521	0.241257	0.04007	0.323267	0.208467	0.196371	0.158402
PP19	b9	8	tri	0.3009	1.017	0.29587	0.02762	0.292096	0.0830894	0.317964	0.304866	0.345886	0.18012	0.231601	0.231767	0.212978	0.271501	0.324806	0.213566	0.262434	0.339606	0.273432	0.360709	0.357032	0.392002	0.290778	0.39827	0.322326	0.19073	0.105309	0.0673885	0.297937	0.283743	0.248682	0.320028	0.276628	0.270019	0.312	0.307879	0.291809	0.262962	0.323883	0.260317	0.236055	0.0807739	0.245641	0.04508	0.19535	0.152674
PP19	b10	8	tri	0.27636	1.2469	0.221638	0.0286	0.294214	0.100829	0.317091	0.324432	0.211508	0.170606	0.255646	0.190406	0.300584	0.282023	0.282685	0.205909	0.240482	0.347645	0.22635	0.366069	0.329867	0.40383	0.400746	0.292072	0.26124	0.321862	0.105309	0.096348	0.240482	0.277083	0.251246	0.295912	0.290516	0.280899	0.287655	0.274401	0.432654	0.323383	0.292077	0.263617	0.24297	0.130614	0.233068	0.0603184	0.215152	0.131761
PP47	a1	8	tri	0.81105	2.77657	0.292105	0.03471	0.440325	0.10898	0.489148	0.491874	0.170688	0.284727	0.550895	0.5358	0.485957	0.464716	0.443555	0.518043	0.37129	0.459628	0.335268	0.53366	0.279804	0.51635	0.376923	0.353877	0.468128	0.351311	0.116946	0.101014	0.485962	0.548171	0.475712	0.429362	0.452791	0.468797	0.47071	0.491376	0.54041	0.406391	0.449555	0.465064	0.266857	0.11806	0.298364	0.176838	0.273384	0.254761
PP47	a2	8	tri	0.73378	2.89155	0.253767	0.04082	0.478422	0.185553	0.512429	0.457833	0.136427	0.268098	0.576645	0.482849	0.512049	0.462252	0.419797	0.358832	0.420517	0.536895	0.406393	0.634284	0.452588	0.55822	0.425671	0.48686	0.471902	0.449006	0.19487	0.176235	0.476156	0.515374	0.390856	0.415165	0.522201	0.555174	0.489873	0.47871	0.384367	0.441151	0.516424	0.458251	0.247004	0.11795	0.32724	0.241079	0.290453	0.266867
PP47	a3	7	tri	0.61478	2.45415	0.250506	0.04926	0.422737	0.128201	0.455671	0.458694	0.331132	0.274743	0.307686	0.325068	0.447594	0.459428	0.394579	0.400296	0.398447	0.607554	0.411051	0.578462	0.419203	0.478113	0.327289	0.384377	0.492113	0.332535	0.129431	0.12697	0.414371	0.410577	0.390853	0.467763	0.4359	0.527982	0.490829	0.377857	0.448539	0.46103	0.507895	0.421636	0.250446	0.233546	0.270825	0.12912	0.359126	0.161024
PP47	b4	8	tri	0.44182	2.06131	0.214339	0.03047	0.363888	0.125442	0.424433	0.402047	0.211798	0.238951	0.427555	0.322409	0.342481	0.347999	0.463611	0.367053	0.361174	0.435999	0.325794	0.401709	0.303203	0.313454	0.2465	0.314474	0.514909	0.333887	0.107589	0.143294	0.476019	0.458753	0.362871	0.414549	0.371877	0.276469	0.466295	0.382905	0.388813	0.384956	0.346072	0.377094	0.24923	0.143489	0.256276	0.164147	0.266395	0.213517
PP47	b5	8	tri	0.5325	2.02739	0.262653	0.02607	0.372578	0.112677	0.46846	0.370072	0.184453	0.25735	0.385501	0.326126	0.287249	0.342054	0.370616	0.364902	0.341799	0.528336	0.370211	0.462605	0.252954	0.485227	0.334207	0.347309	0.450599	0.311548	0.115877	0.109476	0.452807	0.30571	0.4018	0.426304	0.346272	0.369952	0.465847	0.485603	0.39677	0.438183	0.351503	0.417871	0.254952	0.194166	0.241694	0.164201	0.257558	0.205787
PP47	b6	8	tri	0.53213	1.93001	0.275714	0.02438	0.346549	0.110682	0.474678	0.406362	0.181416	0.246511	0.260455	0.360508	0.320748	0.332738	0.36168	0.270113	0.236103	0.392483	0.244687	0.457485	0.346282	0.437667	0.312687	0.314957	0.502117	0.394077	0.117565	0.103798	0.43988	0.351883	0.291394	0.429723	0.399753	0.372342	0.344395	0.405871	0.356709	0.370221	0.487131	0.380863	0.246066	0.193661	0.208794	0.19454	0.213564	0.249946
PP47	c7	7	tri	0.44724	2.0029	0.223296	0.02134	0.387309	0.0699507	0.366354	0.40342	0.163349	0.227691	0.445086	0.273863	0.319087	0.354987	0.415186	0.361107	0.406018	0.482309	0.380131	0.51671	0.3496	0.400166	0.324745	0.400032	0.400961	0.366961	0.0608899	0.0790115	0.334953	0.466203	0.310576	0.48047	0.399245	0.435347	0.355	0.435217	0.339105	0.403734	0.327903	0.350668	0.27301	0.198443	0.28178	0.103911	0.286537	0.170487
PP47	c8	9	tri	0.46205	1.93339	0.238984	0.01064	0.370602	0.104355	0.431112	0.374145	0.458917	0.23713	0.347247	0.390772	0.290904	0.308807	0.472918	0.340407	0.326646	0.419781	0.339645	0.477921	0.263709	0.443724	0.368588	0.398862	0.430895	0.308804	0.105555	0.103156	0.400398	0.390696	0.386753	0.386098	0.385553	0.351649	0.388701	0.49326	0.316452	0.400805	0.403332	0.408929	0.275983	0.186477	0.259628	0.13076	0.255567	0.219546
PP47	c9	6	tri	0.42813	1.80783	0.23682	0.02027	0.322974	0.100998	0.35199	0.404797	0.127096	0.221559	0.376757	0.29808	0.3022	0.28864	0.315604	0.286239	0.31423	0.381892	0.27441	0.363153	0.252994	0.339643	0.245796	0.303731	0.431675	0.392545	0.0902567	0.111739	0.352518	0.420269	0.413065	0.3575	0.35064	0.297954	0.30378	0.310455	0.411929	0.276406	0.429491	0.40219	0.20337	0.140875	0.305204	0.158097	0.243004	0.206887
PP47	d10	8	tri	0.53411	1.98812	0.268651	0.01088	0.345153	0.0853265	0.420836	0.404645	0.190211	0.239045	0.364014	0.353508	0.33381	0.365594	0.295041	0.294736	0.302515	0.37247	0.321463	0.396548	0.316842	0.420938	0.220846	0.362435	0.435286	0.366399	0.0864681	0.0841849	0.376709	0.38923	0.356505	0.371727	0.384696	0.357886	0.322607	0.432832	0.443283	0.431946	0.414339	0.374439	0.173881	0.203861	0.250932	0.176514	0.261175	0.177955
PP48	a1	8	tri	0.32348	1.18647	0.272641	0.01598	0.293568	0.088768	0.402138	0.302005	0.108476	0.178428	0.244789	0.313655	0.285041	0.341728	0.311851	0.224367	0.303393	0.377923	0.281971	0.349931	0.295063	0.324576	0.285545	0.210773	0.29525	0.25124	0.0841092	0.0934268	0.302958	0.304142	0.309821	0.334907	0.356433	0.27175	0.344005	0.275418	0.278362	0.296534	0.290609	0.298075	0.189968	0.111289	0.164947	0.149581	0.194835	0.243719
PP48	a2	8	tri	0.27775	0.97906	0.28369	0.01171	0.280092	0.106524	0.260121	0.269279	0.120645	0.161657	0.217081	0.263419	0.275611	0.239081	0.262923	0.267392	0.271594	0.354848	0.255232	0.353207	0.270584	0.341341	0.341728	0.246731	0.287438	0.233264	0.12139	0.0916588	0.31258	0.260799	0.299497	0.25677	0.290186	0.289403	0.302212	0.258788	0.284129	0.278362	0.275418	0.300472	0.179476	0.110108	0.17537	0.112067	0.199685	0.115415
PP48	a3	8	tri	0.29884	0.96999	0.308086	0.02177	0.251872	0.0928061	0.365324	0.26162	0.125179	0.178612	0.233313	0.261429	0.209531	0.211392	0.211546	0.191337	0.264119	0.305391	0.21932	0.308511	0.230833	0.337066	0.281813	0.248453	0.289588	0.226306	0.107411	0.0782011	0.299231	0.2734	0.303393	0.226499	0.312619	0.261926	0.260343	0.319467	0.281316	0.260139	0.265267	0.298918	0.208068	0.0961824	0.18195	0.12963	0.194153	0.194221
PP48	a4	8	tri	0.32592	1.11834	0.291432	0.01615	0.30847	0.10708	0.332878	0.312894	0.123443	0.184201	0.321364	0.317278	0.267717	0.288541	0.31848	0.257316	0.325914	0.389494	0.302202	0.403738	0.283705	0.327006	0.274423	0.277304	0.338396	0.242643	0.0769469	0.137213	0.303824	0.280078	0.273355	0.346027	0.321641	0.300503	0.293957	0.357169	0.303255	0.336418	0.322218	0.317684	0.158699	0.162951	0.158419	0.0679234	0.283062	0.158688
PP48	a5	8	tri	0.30058	1.18225	0.254244	0.02375	0.319341	0.137873	0.327103	0.287818	0.138162	0.174165	0.304539	0.256215	0.286765	0.286447	0.25288	0.296534	0.392584	0.443284	0.331341	0.373259	0.332545	0.343749	0.298616	0.298906	0.352996	0.258789	0.103063	0.172683	0.307561	0.290977	0.317553	0.291097	0.307242	0.332029	0.329	0.337877	0.298367	0.333981	0.270832	0.329	0.174875	0.129625	0.17661	0.151102	0.16854	0.168209
PP48	b6	7	tri	0.30465	1.16742	0.26096	0.02083	0.277285	0.0740548	0.326331	0.317005	0.120761	0.187993	0.26635	0.220863	0.243641	0.315719	0.276618	0.225162	0.286123	0.384895	0.203909	0.315824	0.216186	0.349101	0.267999	0.265166	0.340911	0.258096	0.0938496	0.05426	0.314176	0.327517	0.334312	0.296769	0.284592	0.220204	0.337429	0.263457	0.298	0.271469	0.345734	0.357894	0.187833	0.171003	0.229511	0.0938396	0.184687	0.102995
PP48	b7	8	tri	0.2957	1.29595	0.228172	0.02002	0.320755	0.105943	0.354867	0.310316	0.180721	0.187183	0.242649	0.31074	0.265891	0.249614	0.305968	0.290141	0.344742	0.439235	0.322126	0.411529	0.33282	0.400625	0.28866	0.306645	0.349401	0.271286	0.0971544	0.114732	0.288369	0.308823	0.30902	0.321854	0.291482	0.348252	0.36663	0.399502	0.280846	0.352416	0.32974	0.261048	0.175148	0.107736	0.218924	0.0802957	0.218368	0.162252
PP48	b8	6	tri	0.31368	1.08876	0.288108	0.02457	0.258785	0.0938539	0.367051	0.284124	0.0912973	0.185775	0.248052	0.279024	0.269125	0.254631	0.253294	0.261473	0.253677	0.340491	0.217086	0.27837	0.180629	0.308345	0.245289	0.222179	0.29131	0.237581	0.0861434	0.101564	0.331804	0.315561	0.262673	0.284713	0.320046	0.27732	0.327923	0.326963	0.275737	0.281323	0.260485	0.298242	0.213529	0.128053	0.174937	0.162252	0.192111	0.154089
PP48	b9	8	tri	0.31275	1.09572	0.285429	0.0282	0.25506	0.114485	0.366217	0.294936	0.141561	0.186398	0.212606	0.231888	0.224957	0.238041	0.202777	0.218377	0.224957	0.366638	0.261796	0.306292	0.248242	0.337428	0.225008	0.198406	0.309015	0.274538	0.108957	0.120013	0.293304	0.308902	0.326882	0.290186	0.245038	0.320951	0.310591	0.276615	0.297958	0.206109	0.282697	0.323029	0.198532	0.146652	0.246671	0.128247	0.161041	0.193934
PP48	b10	6	tri	0.30901	1.11885	0.276185	0.01606	0.256313	0.0768952	0.346204	0.28875	0.0912648	0.188796	0.197547	0.185672	0.241091	0.252762	0.247064	0.187505	0.21573	0.329033	0.195126	0.35854	0.266766	0.320612	0.244144	0.254635	0.34262	0.262161	0.0648737	0.0889168	0.287141	0.309774	0.262113	0.291177	0.328154	0.268447	0.273073	0.315557	0.281199	0.31075	0.272849	0.317097	0.222015	0.162845	0.204625	0.108958	0.225175	0.109184
						#DIV/0!		0	0					0	0	0	0	0	0	0	0	0	0	0	0	0	0	0	0	0	0	0	0	0	0	0	0	0	0	0	0	0	0	0	0	0	0	0	0
[truncated: 9 more columns]
